# Supplementary material for: Spatial heterogeneity of soil organic matter and microbial community composition across ice-wedge polygons and soil layers in Arctic lowland tundra
Source: Copernicus journal article supplement (doi:10.5194/egusphere-2025-4603), 2025-10-05
Supplement: Supplementary file 1 [file egusphere-2025-4603-supplement.pdf]

# Supplementary

## Table of Contents

|                                    |   |
|------------------------------------|---|
| Study area and soil sampling ..... | 3 |
|------------------------------------|---|

### *Supplementary Tables*

|                                                                                                                                                                 |     |
|-----------------------------------------------------------------------------------------------------------------------------------------------------------------|-----|
| <b>[Table 1]</b> Sampled soil pits - (a) polygon types, coordinates, and vegetation composition;<br>(b) active layer depths and in-situ soil temperatures ..... | 5-6 |
|-----------------------------------------------------------------------------------------------------------------------------------------------------------------|-----|

### *Supplementary Figures*

|                                                                                    |   |
|------------------------------------------------------------------------------------|---|
| <b>[Table 1]</b> Examples for investigated (a) polygon types; (b) soil layers..... | 7 |
|------------------------------------------------------------------------------------|---|

|                                                         |   |
|---------------------------------------------------------|---|
| Physicochemical soil parameters and stoichiometry ..... | 9 |
|---------------------------------------------------------|---|

### *Supplementary Tables*

|                                                                                                                   |       |
|-------------------------------------------------------------------------------------------------------------------|-------|
| <b>[Table 2]</b> Physicochemical soil parameters and stoichiometry across (a) polygon types; (b) soil layers..... | 10-11 |
|-------------------------------------------------------------------------------------------------------------------|-------|

|                                                   |    |
|---------------------------------------------------|----|
| Chemical composition of soil organic matter ..... | 12 |
|---------------------------------------------------|----|

### *Supplementary Tables*

|                                                                                              |       |
|----------------------------------------------------------------------------------------------|-------|
| <b>[Table 3]</b> Assignment of pyrolysis products into SOM compound groups .....             | 15-22 |
| <b>[Table 4]</b> Correlations between SOM compound group abundances and soil C content ..... | 23    |

### *Supplementary Figures*

|                                                                                                               |    |
|---------------------------------------------------------------------------------------------------------------|----|
| <b>[Fig.2]</b> Number of shared and unique pyrolysis products across (a) polygon types; (b) soil layers ..... | 24 |
| <b>[Fig.3]</b> Absolute abundances of SOM compound groups across (a) polygon types; (b) soil layers .....     | 25 |
| <b>[Fig.4]</b> Relative abundances of SOM compound groups across (a) polygon types; (b) soil layers .....     | 26 |

|                                 |    |
|---------------------------------|----|
| Soil microbial communities..... | 27 |
|---------------------------------|----|

### *Supplementary Tables*

|                                                                                                                                                                           |       |
|---------------------------------------------------------------------------------------------------------------------------------------------------------------------------|-------|
| <b>[Table 5]</b> ddPCR cycling conditions .....                                                                                                                           | 29    |
| <b>[Table 6]</b> Microbial richness, diversity, and abundance across (a) polygon types; (b) soil layers .....                                                             | 30-33 |
| <b>[Table 7]</b> Interactive effects of polygon type and soil layer category on bacterial and archaeal community composition (corresponding to Fig. 3 in main text) ..... | 34    |
| <b>[Table 8]</b> Abundances of selected bacterial and archaeal phyla .....                                                                                                | 35-40 |

|                                                                                                                                                                          |       |
|--------------------------------------------------------------------------------------------------------------------------------------------------------------------------|-------|
| <b>[Table 9]</b> Abundances of fungal phyla.....                                                                                                                         | 41-42 |
| <i>Supplementary Figures</i>                                                                                                                                             |       |
| <b>[Fig.5]</b> Number of shared and unique bacterial and archaeal ASVs across (a) polygon types; (b) soil layers .....                                                   | 43    |
| <b>[Fig.6]</b> Number of shared and unique fungal ASVs across (a) polygon types; (b) soil layers .....                                                                   | 44    |
| <b>Extracellular enzymatic activity potential</b> .....                                                                                                                  | 45    |
| <i>Supplementary Tables</i>                                                                                                                                              |       |
| <b>[Table 10]</b> Correlations between enzyme activities and Soil C, N, P contents .....                                                                                 | 45    |
| <b>[Table 11]</b> Interactive effects of polygon type and soil layer category on extracellular enzymatic activity potential (corresponding to Fig. 5 in main text) ..... | 46-47 |
| <i>Supplementary Figures</i>                                                                                                                                             |       |
| <b>[Fig.6]</b> Extracellular enzymatic activity potential (per gram dry soil) .....                                                                                      | 48    |
| <b>Statistics</b> .....                                                                                                                                                  | 50    |
| <b>References</b> .....                                                                                                                                                  | 52    |

## Section 1: Study area and soil sampling

We studied two areas classified as Arctic lowland ice-wedge polygon tundra, located on the coastal plain of the Yukon, Western Canada (Figure 1). The first focus area comprised two small lagoons called Ptarmigan Bay (69°27'N, 139°05'W) and Whale Bay (69°25'N, 138°59'W). The second focus area, approximately 40 km further towards the west, called Komakuk Beach (69°35'N, 140°10'W), is a small coastal catchment positioned between two alluvial fans. Despite their close vicinity, the areas differ in their glaciation history. Throughout the Pleistocene, the areas of Ptarmigan Bay and Whale Bay were covered by ice sheets, whereas the Komakuk Beach further west stayed unglaciated (Dyke and Prest, 1987; Fritz et al., 2012). The surface geology mainly comprises lacustrine, fluvial (Ptarmigan Bay and Komakuk Beach) and morainal deposits (Whale Bay) (Fritz et al., 2012; Rampton, 1982).

The periglacial landscape is characterized by a mosaic of ice-wedge polygon networks, mires, beaded streams, and thermokarst lakes (Rampton, 1982; Speetjens et al., 2022), underlain by continuous permafrost with a high ground ice content (Couture and Pollard, 2017; Westerveld et al., 2023). The climate is classified as Polar Tundra (Beck et al., 2018). Recorded mean annual temperatures (1972 - 2000) at the climate stations Komakuk Beach and Shingle Point (68° 57'N, 137° 13'W) were - 11 °C (± 2.0 °C) and - 9.9 °C (± 4.5 °C). Average summer temperatures (June-August) were 6 °C (± 1.6 °C) and 8.6 °C (± 1.6 °C). Mean annual precipitation (1972 – 2000) was 161 mm and 254 mm correspondingly (Government of Canada, 2024). The vegetation period lasts approximately from June to September (Frank-Fahle et al., 2014). The vegetation map defines the area as bioclimatic subzone E/ low Arctic shrub tundra (Walker et al., 2005).

Differences in microtopography and relief are strong determinants for the identity of the prevailing soil suborder and plant species composition. Turbic Cryosols were present in the drier centres of HCPs and FCPs (Canadian System of Soil Classification, Soil Classification Working Group, 1998). These soils harbor up to 40 cm thick organic horizons with material being of various decomposition stages, followed by a pronounced silt- and clay-rich mineral subsoil layer which commonly exhibits cryoturbations or gleyic features (Tarnocai, 2004). Dwarf-shrubs (e.g., *Betula nana*, *Salix arctica*, *Salix alaxensis*, *Empetrum nigrum*, *Vaccinium* sp.), forbs (e.g., *Rubus chamaemorus*, *Dryas* sp.) and lichens dominated the centres of HCPs. FCPs were mainly characterised by *Eriophorum vaginatum* tussocks and dwarf-shrubs. Inundated centres of LCP harbored Organic Cryosols, which show a more than 40 cm thick characteristic sequence from fibric to hemic to sapric sphagnum- or sedge- derived material with increasing depth. The dominant plant groups were graminoids (*Carex aquatilis*, *Eriophorum vaginatum*, *Eriophorum angustifolium*), brown mosses (Amblystegiaceae), and

36 peat mosses (*Sphagnum sp.*) (Brooks and Lane, 2011; Rampton, 1982; Walker et al., 2005).  
37 Towards the drier rims, Organic Cryosols transitioned into Cryosols of the Gleysolic or Static  
38 type, indicated by higher dwarf shrub abundance.

39

**Supplementary Table 1(a):** Sampled soil pits - polygon type, coordinates, and vegetation composition.

| Soil pit | Study Area    | Polygon type | N              | W               | Comments                                                                                                          |
|----------|---------------|--------------|----------------|-----------------|-------------------------------------------------------------------------------------------------------------------|
| 1        | Ptarmigan Bay | HCP          | 69° 27.862500' | 139° 4.939320'  | tussock tundra, <i>Salix sp.</i> , <i>Betula sp.</i> , <i>Sphagnum sp.</i> , mosses, lichens                      |
| 2        | Ptarmigan Bay | HCP          | 69° 27.860040' | 139° 5.103600'  | <i>Salix sp.</i> , <i>Betula sp.</i> , <i>Empetrum nigrum</i> , <i>Dryas sp.</i> , <i>Vaccinium sp.</i> , lichens |
| 3        | Ptarmigan Bay | HCP          | 69° 27.881220' | 139° 5.219760'  | <i>Salix sp.</i> , <i>Betula sp.</i> , <i>Rubus chamaemorus</i> , <i>Vaccinium sp.</i> , mosses, lichens          |
| 4        | Whale Bay     | FCP          | 69° 25.561920' | 138° 59.929800' | tussock tundra, <i>Salix sp.</i> , <i>Betula sp.</i> , graminoids                                                 |
| 5        | Whale Bay     | FCP          | 69° 25.601040' | 139° 0.145080'  | tussock tundra, <i>Salix sp.</i> , <i>Betula sp.</i> , <i>Vaccinium sp.</i> , <i>Ledum sp.</i> , mosses           |
| 6        | Whale Bay     | FCP          | 69° 25.522920' | 138° 59.908980' | tussock tundra, <i>Salix sp.</i> , <i>Vaccinium sp.</i> , <i>Ledum sp.</i> , mosses                               |
| 7        | Ptarmigan Bay | LCP          | 69° 27.913140' | 139° 5.086560'  | Sedge-dominated, <i>Eriophorum sp.</i> , <i>Sphagnum sp.</i> , brown mosses                                       |
| 8        | Ptarmigan Bay | LCP          | 69° 27.922800' | 139° 5.084160'  | Sedge-dominated, <i>Eriophorum sp.</i> , <i>Sphagnum sp.</i> , brown mosses                                       |
| 9        | Ptarmigan Bay | LCP          | 69° 27.917880' | 139° 5.030940'  | Sedge-dominated, <i>Eriophorum sp.</i> , <i>Sphagnum sp.</i> , brown mosses                                       |
| 10       | Komakuk Beach | HCP          | 69° 35.590020' | 140° 9.880020'  | <i>Betula sp.</i> , <i>Dryas sp.</i> , <i>Rubus chamaemorus</i> , mosses, lichens                                 |
| 11       | Komakuk Beach | HCP          | 69° 35.577000' | 140° 9.826980'  | <i>Betula sp.</i> , <i>Salix sp.</i> , <i>Vaccinium sp.</i> , <i>Rubus chamaemorus</i> , mosses                   |
| 12       | Komakuk Beach | HCP          | 69° 35.610000' | 140° 9.768000'  | tussock tundra, <i>Betula sp.</i> , <i>Empetrum nigrum</i> , mosses, lichens, fungi                               |
| 13       | Komakuk Beach | FCP          | 69° 35.338020' | 140° 9.847020'  | flat tundra surrounded by wetlands, <i>Carex sp.</i> , <i>Salix sp.</i>                                           |
| 14       | Komakuk Beach | FCP          | 69° 35.551980' | 140° 9.454020'  | flat tundra, <i>Carex sp.</i> , <i>Eriophorum sp.</i> , <i>Betula sp.</i> , <i>Vaccinium sp.</i> , mosses         |
| 15       | Komakuk Beach | FCP          | 69° 35.752020' | 140° 9.292980'  | flat tundra, <i>Carex sp.</i> , <i>Salix sp.</i> , mosses, <i>Eriophorum sp.</i>                                  |
| 16       | Komakuk Beach | LCP          | 69° 34.623000' | 140° 10.621980' | Sedge-dominated, <i>Carex sp.</i> , <i>Salix sp.</i> , <i>Sphagnum sp.</i> , brown mosses                         |
| 17       | Komakuk Beach | LCP          | 69° 34.852020' | 140° 11.119020' | Sedge-dominated, <i>Carex sp.</i> , <i>Salix sp.</i> , <i>Sphagnum sp.</i> , brown mosses                         |
| 18       | Komakuk Beach | LCP          | 69° 34.894980' | 140° 10.929000' | Sedge-dominated, <i>Eriophorum sp.</i> , brown mosses                                                             |

Dry areas of HCPs were typically dominated by dwarf-shrubs, forbs, and lichen, while in centres of LCPs, the vegetation was adapted to water-saturated conditions and mostly graminoids or peat- and brown-mosses prevailed.

**Supplementary Table 1(b):** Sampled soil pits - active layer depths and in-situ soil temperatures.

| Soil pit | Study Area    | Polygon type | AL depth (cm) | In-situ Soil Temp (°C) |       |       |          |
|----------|---------------|--------------|---------------|------------------------|-------|-------|----------|
|          |               |              |               | 5 cm                   | 15 cm | 25 cm | PF Table |
| 1        | Ptarmigan Bay | HCP          | 35.0          | 7.7                    | 2.5   | 1.8   | 1.4      |
| 2        | Ptarmigan Bay | HCP          | 30.0          | 4.5                    | 2.8   | 1.7   | 1.5      |
| 3        | Ptarmigan Bay | HCP          | 31.0          | 4.3                    | 3.9   | 3.6   | 0.9      |
| 4        | Whale Bay     | FCP          | 40.0          | 4.9                    | 1.9   | 0.9   | 0.3      |
| 5        | Whale Bay     | FCP          | 40.0          | 4.4                    | 4.0   | 2.5   | 1.9      |
| 6        | Whale Bay     | FCP          | 40.0          | 7.7                    | 2.9   | 2.3   | 1.2      |
| 7        | Ptarmigan Bay | LCP          | 40.0          | 4.8                    | 4.4   | 3.8   | 2.0      |
| 8        | Ptarmigan Bay | LCP          | 30.0          | 3.8                    | 3.6   | 3.4   | 2.5      |
| 9        | Ptarmigan Bay | LCP          | 30.0          | 6.6                    | 5.6   | 4.5   | n.a.     |
| 10       | Komakuk Beach | HCP          | 30.0          | 5.1                    | 3.4   | 2.4   | 1.6      |
| 11       | Komakuk Beach | HCP          | 22.5          | 3.6                    | 2.5   | -     | 1.5      |
| 12       | Komakuk Beach | HCP          | 30.5          | 5.5                    | 4.5   | 3.6   | 2.3      |
| 13       | Komakuk Beach | FCP          | 28.0          | 7.4                    | 2.5   | 1.4   | 0.4      |
| 14       | Komakuk Beach | FCP          | 30.0          | 4.7                    | 4.3   | 3.4   | 2.6      |
| 15       | Komakuk Beach | FCP          | 22.5          | 4.6                    | 1.1   | -     | 0.1      |
| 16       | Komakuk Beach | LCP          | 45.0          | 6.6                    | 6.2   | 4.7   | 0.8      |
| 17       | Komakuk Beach | LCP          | 52.0          | 6.8                    | 5.6   | 3.6   | n.a.     |
| 18       | Komakuk Beach | LCP          | 40.0          | 5.7                    | 4.3   | 3.0   | 0.2      |

Average active layer depth was ~ 30 cm in HCPs, ~33 cm in FCPs, and ~40 cm in LCPs. Average in-situ soil temperatures declined from  $5.5 \pm 0.3$  °C (mean  $\pm$  stderr) at the surface (5 cm depth), to  $3.7 \pm 0.3$  °C at 15 cm depth, to  $2.9 \pm 0.3$  °C in 25 cm depth to  $1.3 \pm 0.2$  °C at the permafrost table, respectively.

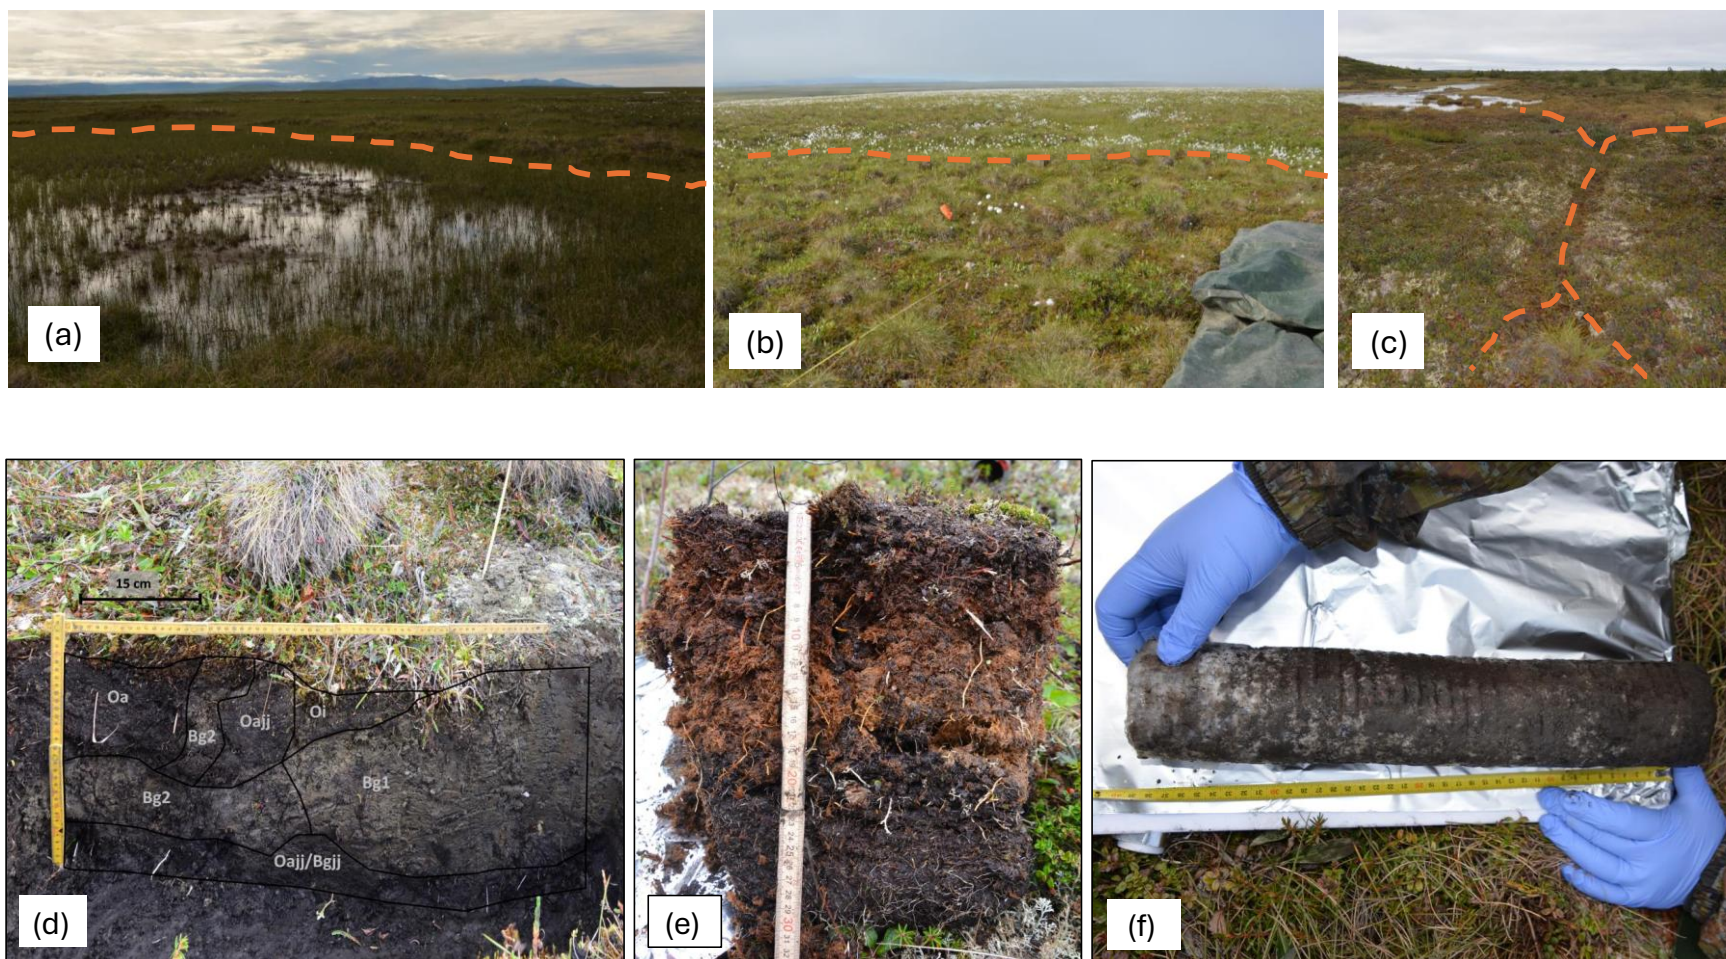

**Supplementary Figure 1:** Examples for investigated ice-wedge polygon types and soil layers. Orange dotted lines roughly mark polygon borders. (a) Low-centered polygon (LCP), with dry, elevated rim around inundated center; (b) Flat-centered polygon (FCP) with presence of cotton grass indicating wetter trough

*around flat-center; (c) High-centered polygon (HCP), with presence of mosses indicating wetter troughs around drier, elevated centres; (d) active layer sampling from soil pits (applied for HCPs and FCPs). Horizon boundaries (perspective corrected) were drawn on the image:(Source: Wagner et al., 2023).(e) active layer sampling from LCPs (extracted peat block). (f) frozen permafrost sampling (example for core that was extracted via gas powered SIPRE corer; note that 'permafrost layer' in this manuscript refers to the upper 10 cm, respectively). Photo credits: Julia Wagner and Victoria Martin.*



## Section 2: Physicochemical soil parameters and stoichiometry

In the field, samples were weighed for bulk density measurements (see Wagner et al., 2023). Gravimetric soil water content ( $\text{g H}_2\text{O g}^{-1} \text{ DW}$ ) was determined at the facilities of the Aurora Research Institute, Inuvik, Canada, before transporting the samples to Vienna ( $80^\circ\text{C}$  for 48 hours). Soil pH was determined in a 1:5 (w/v) soil:MQ water slurry using a Sentron SI600. Aliquots of dry soils were ground to fine powder using a ball-mill (MM-2000, Retsch, Germany). Subsequently, 1-8 mg per sample (depending on the anticipated differences in C content between soil layer categories) were weighed into tin capsules and analyzed for total carbon ( $\text{mg C g}^{-1} \text{ DW}$ ) and nitrogen ( $\text{mg N g}^{-1} \text{ DW}$ ) contents via elemental analyzer (EA 1110, CE Instruments, Italy) coupled to a continuous-flow isotopic ratio mass spectrometer (IRMS, DeltaPlus, Finnigan MAT). The soils did not contain any carbonates, which was tested by adding 1M HCl to the samples before subjecting them to the EA-IRMS. Isotopic signatures ( $\delta^{13}\text{C}$ ,  $\delta^{15}\text{N}$ , ‰) were expressed relative to the international standard VPDB. Soil C:N, C:P, and N:P ratios were calculated on a mass basis. Pools of dissolved C and N (DOC, TDN;  $\text{mg g}^{-1} \text{ DW}$ ) were determined with a TOC/TN-Analyzer (Shimadzu TOC-VCP/CPNTNM-1, Shimadzu, Korneuburg, Austria) in 1M KCl extracts (soil to solution ratio 1:7.5 (w/v)). The soil total phosphorus pool (Soil P) was obtained via a modified ignition method by Kuo (1996), which mediates the conversion of organic bound P to inorganic P. Therefore, 200 - 500 mg dry and milled soils were combusted for 5 h at  $450^\circ\text{C}$ , (muffle device Heraeus M1100/1) and then extracted for 16 hours with 10 ml 0.5M  $\text{H}_2\text{SO}_4$ . Soil total Phosphorus concentrations ( $\text{mg P g}^{-1} \text{ DW}$ ) were measured in the fresh extracts following the photometric malachite-green assay after D'Angelo and Crutchfield, 2001. All above mentioned extracts have been filtered using Whatman<sup>TM</sup> quantitative ashless cellulose filter paper, grade 40.

**Supplementary Table 2(a).**: Physicochemical soil parameters and stoichiometry across ice-wedge polygon types.

|                                | LCP                | FCP                                  | HCP                | Polygon Type Effect                                      |
|--------------------------------|--------------------|--------------------------------------|--------------------|----------------------------------------------------------|
| pH (MQ)                        | 5.72 ± 0.09 (b)    | 5.92 ± 0.05 (a)                      | 5.66 ± 0.06 (b)    | <b>p = 4.3 e<sup>-3</sup></b> (Chi <sup>2</sup> = 10.92) |
| SWC (g g <sup>-1</sup> DW)     | 2.93 ± 0.33 (a)    | 2.20 ± 0.32 (a)                      | 2.03 ± 0.27 (a)    | p = 0.603 (F = 0.51)                                     |
| δ <sup>13</sup> C (‰)          | -27.90 ± 0.13 (a)  | -26.73 ± 0.12 (b)                    | -27.42 ± 0.18 (a)  | <b>p = 1.6 e<sup>-5</sup></b> (Chi <sup>2</sup> = 22.1)  |
| δ <sup>15</sup> N (‰)          | 0.34 ± 0.13 (b)    | 1.31 ± 0.20 (a)                      | 1.63 ± 0.22 (a)    | <b>p = 2.3 e<sup>-3</sup></b> (F = 9.77)                 |
| Soil C (mg g <sup>-1</sup> DW) | 312.37 ± 30.81 (a) | 204.19 ± 21.68 (a)                   | 229.65 ± 23.34 (a) | <b>p = 0.059</b> (F = 3.31)                              |
| Soil N (mg g <sup>-1</sup> DW) | 18.1 ± 1.90 (a)    | 10.04 ± 0.91 (b)                     | 12.14 ± 1.21 (b)   | <b>p = 2.8 e<sup>-3</sup></b> (Chi <sup>2</sup> = 11.72) |
| Soil P (mg g <sup>-1</sup> DW) | 0.43 ± 0.03 (*int) | 0.68 ± 0.05 (*int) <sub>[n=30]</sub> | 0.63 ± 0.06 (*int) | <b>p = 7.0 e<sup>-3</sup></b> (F = 5.34)                 |
| Soil C:N                       | 17.54 ± 0.37 (a)   | 20.09 ± 1.57 (a)                     | 19.42 ± 0.98 (a)   | p = 0.375 (Chi <sup>2</sup> = 3.11)                      |
| Soil C:P                       | 783.09 ± 91.44 (a) | 305.98 ± 31.02 (b) <sub>[n=30]</sub> | 389.45 ± 37.03 (b) | <b>p = 4.8 e<sup>-5</sup></b> (F = 22.07)                |
| Soil N:P                       | 45.06 ± 5.30 (a)   | 15.49 ± 1.04 (b) <sub>[n=30]</sub>   | 20.05 ± 1.70 (b)   | <b>p = 8.8 e<sup>-6</sup></b> (F = 37.7)                 |
| DOC (µg g <sup>-1</sup> DW)    | 551.99 ± 76.89 (a) | 355.06 ± 64.63 (a)                   | 400.95 ± 87.34 (a) | p = 0.076 (Chi <sup>2</sup> = 5.15)                      |
| TDN (µg g <sup>-1</sup> DW)    | 38.51 ± 6.07 (a)   | 26.63 ± 7.57 (a)                     | 30.89 ± 6.14 (a)   | p = 0.404 (F = 0.95)                                     |
| DOC:TDN                        | 17.69 ± 2.66 (a)   | 20.49 ± 3.21 (a)                     | 16.01 ± 2.32 (a)   | p = 0.122 (F = 2.17)                                     |

Presented are means ± standard error ( $n_{LCP}=20$ ,  $n_{FPT}=32$ ,  $n_{HCP}=29$ ; with individual deviations noted in the table). Statistical results from linear mixed-effects models (Type II ANOVA *p*-values and *F*-statistics) are shown in the right column. When model assumptions were not met, Kruskal Wallis tests were used (*p*-values and Chi<sup>2</sup> statistics). Pairwise comparisons (Tukey-adjusted emmeans or Bonferroni-adjusted pairwise Wilcoxon tests) are indicated by letter groupings in brackets. Significant interactions between polygon type and soil layer are marked with (\*int).

**Interactive effects:**

Soil P (mg g<sup>-1</sup> DW) was significantly lower in the organic layer of LCPs compared to FCPs and HCPs (lme:  $p=0.049$ ,  $F=2.4$ ; emmeans pairwise test<sub>organic</sub>: LCP vs. FCP  $p=0.0001$ ,  $t=-4.5$ ; LCP vs. HCP  $p<0.0001$ ,  $t=-4.8$ ). Abbreviations: SWC= soil water content, DOC= dissolved organic C, TDN= total dissolved N.

**Supplementary Table 2(b).**: Physicochemical soil parameters and stoichiometry across soil layer categories.

|                                | organic                   | mineral                   | cryoturbated       | permafrost         | Soil Layer Effect                                         |
|--------------------------------|---------------------------|---------------------------|--------------------|--------------------|-----------------------------------------------------------|
| pH (MQ)                        | 5.63 ± 0.06 (b)           | 5.91 ± 0.06 (ab)          | 5.80 ± 0.09 (ab)   | 5.94 ± 0.06 (a)    | <b>p = 9.3 e<sup>-3</sup></b> (Chi <sup>2</sup> = 11.51)  |
| SWC (g g <sup>-1</sup> DW)     | 3.72 ± 0.23 (a)           | 0.45 ± 0.03 (c)           | 1.41 ± 0.19 (b)    | 1.75 ± 0.18 (b)    | <b>p = 2.0 e<sup>-16</sup></b> (F = 80.21)                |
| δ <sup>13</sup> C (‰)          | -27.34 ± 0.15 (a)         | -27.59 ± 0.26 (a)         | -27.16 ± 0.23 (a)  | -26.96 ± 0.17 (a)  | p = 0.203 (Chi <sup>2</sup> = 4.60)                       |
| δ <sup>15</sup> N (‰)          | 1.39 ± 0.20 (a)           | 1.58 ± 0.29 (ab)          | 1.04 ± 0.21 (bc)   | 0.61 ± 0.26 (c)    | <b>p = 1.2 e<sup>-4</sup></b> (F = 8.14)                  |
| Soil C (mg g <sup>-1</sup> DW) | 351.19 ± 15.53 (a)        | 63.33 ± 7.58 (c)          | 185.39 ± 19.29 (b) | 202.80 ± 19.33 (b) | <b>p = 2.0 e<sup>-16</sup></b> (F = 63.24)                |
| Soil N (mg g <sup>-1</sup> DW) | 18.42 ± 1.03 (a)          | 3.65 ± 0.40 (c)           | 10.11 ± 1.09 (b)   | 10.95 ± 0.89 (b)   | <b>p = 7.5 e<sup>-11</sup></b> (Chi <sup>2</sup> = 50.12) |
| Soil P (mg g <sup>-1</sup> DW) | 0.73 ± 0.05 (*int) [n=34] | 0.46 ± 0.05 (*int) [n=13] | 0.54 ± 0.07 (*int) | 0.49 ± 0.04 (*int) | <b>p = 6.1 e<sup>-6</sup></b> (F = 10.92)                 |
| Soil C:N                       | 20.69 ± 1.57 (a)          | 17.41 ± 0.91 (a)          | 18.64 ± 0.59 (a)   | 18.24 ± 0.44 (a)   | p = 0.375 (Chi <sup>2</sup> = 3.11)                       |
| Soil C:P                       | 590.98 ± 64.14 (a) [n=34] | 158.62 ± 16.14 (b) [n=13] | 374.08 ± 38.28 (a) | 479.85 ± 62.08 (a) | <b>p = 4.9 e<sup>-10</sup></b> (F = 23.11)                |
| Soil N:P                       | 31.67 ± 3.73 (a) [n=34]   | 8.80 ± 0.70 (b) [n=13]    | 20.07 ± 1.92 (a)   | 26.06 ± 3.37 (a)   | <b>p = 2.1 e<sup>-11</sup></b> (F = 28.66)                |
| DOC (µg g <sup>-1</sup> DW)    | 739.61 ± 68.61 (a)        | 59.74 ± 5.07 (c)          | 173.95 ± 25.55 (b) | 265.52 ± 46.41 (b) | <b>p = 1.0 e<sup>-11</sup></b> (Chi <sup>2</sup> = 54.21) |
| TDN (µg g <sup>-1</sup> DW)    | 50.36 ± 7.52 (a)          | 4.04 ± 0.74 (c)           | 15.54 ± 2.63 (b)   | 26.16 ± 4.82 (b)   | <b>p = 1.2 e<sup>-15</sup></b> (F = 44.92)                |
| DOC:TDN                        | 22.13 ± 3.19 (a)          | 22.16 ± 3.83 (a)          | 13.19 ± 1.69 (b)   | 11.43 ± 1.07 (b)   | <b>p = 9.4 e<sup>-5</sup></b> (F = 8.22)                  |

Presented are means ± standard error ( $n_{\text{organic}}=35$ ;  $n_{\text{mineral}}=14$ ;  $n_{\text{cryoturbated}}=13$ ,  $n_{\text{permafrost}}=19$ ; with individual deviations noted in the table). Statistical results from linear mixed-effects models (Type II ANOVA *p*-values and *F*-statistics) are shown in the right column. When model assumptions were not met, Kruskal Wallis tests were used (*p*-values and Chi<sup>2</sup> statistics). Pairwise comparisons (Tukey-adjusted emmeans or Bonferroni-adjusted pairwise Wilcoxon tests) are indicated by letter groupings in brackets. Significant interactions between polygon type and soil layer are marked with (\*int).

**Interactive effects:** In LCPs, soil layers had similar soil *P* concentrations, while in FCPs and HCPs, the organic layer had higher *P* concentrations compared to the mineral and permafrost layers (lme:  $p=0.049$ ,  $F=2.4$ ; emmeans pairwise test\_organic vs.mineral: FCP:  $p=0.0002$ ,  $t=4.6$ ; HCP:  $p=0.0017$ ,  $t=3.9$ ; organic vs. permafrost: FCP:  $p=0.063$ ,  $t=2.6$ ; HCP:  $p=0.005$ ,  $t=3.5$ ). Abbreviations: SWC= soil water content, DOC= dissolved organic C, TDN= total dissolved N).

## Section 3: Chemical composition of soil organic matter

We used Pyrolysis- GC/MS for obtaining characteristic fingerprints of the chemical composition of the soil organic matter pools among the investigated ice-wedge polygon types and soil layer categories. Therefore, we used a semi-automated approach as explained in (Martin et al., 2024), with minor adaptations.

Approximately 0.1 to 0.2 mg of dried and finely milled soil samples were weighed into pyrolysis glass tubes (constricted Quartz Tubes for 6000 DISC and Autosampler, CDS Analytical) deploying a randomized sample order. Ideal sample amounts (adapted to respective soil C concentrations) were determined in pre-tests. We compiled a mixed reference sample out of four randomly selected samples, representing different soil layers, polygon types and sampling areas. To ensure consistent quality of the instruments' performance throughout the runs we included multiple technical replicates of an external soil standard (IHSS Elliott Soil Humic Acid Standard IV) as well as for the mixed reference sample. To account for possible contamination of the glass tubes, we included several blanks throughout the sample sequence. Samples were pyrolyzed (Pyroprobe 6200 and Autosampler 6250T, CDS) at an initial temperature of 50 °C (5 sec) followed by a ramp increase of 20 °C/sec and a final temperature of 600 °C (20 sec). Pyrolysis products were transferred into the GC-TOF-MS system (Pegasus BT GC-MS, LECO) with a constant target flow of 1mL helium/min at 280 °C. After each sample the pyrolysis chamber was heated to 1,000 °C for 60 seconds and flushed clean for the next sample. A polar column (Supelcowax TM 10 Fused Silica Capillary Column, 30 m x 0.25 mm x 0.25 µm film thickness, Sigma- Aldrich) was used. The GC was kept at 50 °C (2 min), followed by an increase of 7 °C/min until reaching the final temperature of 250 °C (5 min). All resulting chromatograms were analyzed with ChromaTOF software (version 5.51.50.068774, LECO).

After visually checking the regularity of the chromatograms from the three technical replicates of the mixed reference sample, one was selected for subsequent manual analysis and creation of a so-called "reference sample compound library". Therefore, we compared the mass spectrum of each individual peak within the chromatogram to suggested spectra from the electron ionization (EI) mass spectral libraries "mainlib" and "replib", contained in the NIST Library of Mass Spectrometry (U.S. Department of Commerce National Institute of Standards and Technology). Prior to confirming the identity of an individual substance, we additionally consulted (i) the fit to in literature reported retention times, (ii) revised the substances' relative position within a sequence of other identified compounds (this is particularly helpful for long-chained alkanes) and (iii) compared the in ChromaTOF included probability assessment of the observed ion m/z versus expected ion m/z. Following this process, we obtained a list of

identified (e.g., “1-Dodecene”) compounds plus compounds which we could not clearly assign to an entry from the NIST libraries, but which we could identify via their unique mass spectrum (e.g., “Peak\_1”).

From this data, we created a library of pyrolysis products that was employed for the subsequent semi-automated analysis of all samples and blanks. Hence, only substances that were included in the library were considered for the subsequent steps. Since this library of pyrolysis products is project specific, it holds representative characteristics of the SOM pool of the respective sampling area. We employed the library-matching algorithm implemented in ChromaTOF and performed an automated targeted compound search for all compounds contained in the library. In this manner, we could reference substances within samples and blanks to those of the library. The  $m/z$  spectrum of every peak within an extracted-ion sample chromatogram (XIC) was compared to the deconvoluted spectrum of the substance from the library. A similarity match score (min. score = 1, max. score = 1000) provided information about the respective fit of the match. For the process of automated hit assignment, we set the minimum similarity match threshold to > 700 (the reliability of this threshold was evaluated during pre-tests in the phase of method development). Further, we set the threshold of the min. peak signal to noise ratio (S/N) >100 to remove background noise within the chromatograms. After completion of the automated assignments via the algorithm, we manually checked the correctness of the automatically matched pyrolysis substances (e.g., “1-Dodecene”, “Peak\_1”) by visual assessment and corrected wrong assignments. Such manual confirmation avoids wrong assignments due to very similar spectra (such as i.e., found with long-chained alkanes), but also allows to include the small fraction of compounds into the dataset, where manual identification is possible, but where the automatic matching algorithm failed (due to not meeting the similarity-threshold-criterion). Following these steps, we derived a presence-absence list from all pyrolysis products listed in the library (“1-Dodecene”, “Peak\_1”), plus their corresponding peak areas from all soil samples and blanks. To control for possible contamination in the pyrolysis system or the glass tubes, a blank correction step was performed on the dataset. Therefore, we subtracted mean areas of substances found in blanks from the area of the respective substance within the samples. Further, we normalized the sample chromatogram peak areas with respective soil carbon contents and the pyrolyzed amount of sample, as both factors can influence peak area and baseline height. Following the assumption that the sum of all pyrolysis-product-areas within a sample equals its carbon content, allowed us to calculate individual substance abundances ( $\text{mg C g}^{-1}$  soil DW).

We employed the phyloseq” package (McMurdie and Holmes, 2013) for handling the dataset, with (i) substance abundances being equivalent to the OTU-abundance matrix, (ii) SOM compound group classification being equivalent to taxonomic information, and (iii) metadata

including information on polygon type and soil layer category. We excluded rare pyrolysis compounds accounting for less than 0.1 % of the total C content per sample. This step helped to reduce the size of the dataset by identifying those substances with a significant contribution to the respective overall sample peak area. From a total of 1387 pyrolysis products in the initial dataset, 534 were consequentially considered for the final SOM fingerprint.

We assigned these 534 pyrolysis products to the following SOM compound groups: (1) “aromatics & phenols [n=51]”, (2) “carbohydrates” [n=48], (3) “N-containing compounds” [n=42], (4) “lignin-derived compounds” [n=16], and (5) “lipids” [n=68], with the classification being supported by literature (Buurman et al., 2005; González-Pérez et al., 2012; Hempfling and Schulten, 1990; Nannes et al., 2017; Said et al., 2015; Saiz-Jimenez and De Leeuw, 1986; Schulten and Schnitzer, 1997; Shen et al., 2018; Stewart, 2012; Tolu et al., 2015; Vancampenhout et al., 2009). In case of no available literature reference, we assigned the compound to one of the mentioned SOM groups based on their molecular structure, employing the US National Library of Medicine (NCBI) PubChem compound database (Kim et al., 2023). We summarized substances that we could not assign to one of the aforementioned compound groups (e.g., “Cyclononasiloxane”), plus all compounds that were matched to a nameless substance in the library (e.g., “Peak\_1”) in a group that we called (6) “general & unknown compounds” [n=309].

**Aromatics & Phenols**

|                                        |                                 |
|----------------------------------------|---------------------------------|
| 1-Butanone, 1-(2-furanyl)-             | 3-Methylphenylacetylene         |
| 1H-Inden-1-one, 2,3-dihydro-           | 9H-Fluorene, 9-methylene-       |
| 1H-Indene, 1,1-dimethyl-               | Acetophenone, 4-hydroxy-        |
| 1H-Indene, 1-ethylidene-               | Azulene                         |
| 1H-Indene, 1-methyl-                   | Benzene, (1,3-dimethylbutyl)-   |
| 1-Naphthalenol                         | Benzene, (2-methyl-1-propenyl)- |
| 2,4-Di-tert-butylphenol                | Benzene, (2-methylpropyl)-      |
| 2-Methylindene                         | Benzene, 1-ethyl-2-methyl-      |
| 2-Naphthalenol                         | Benzene, 1-ethyl-3-methyl-      |
| Benzene, 1-methoxy-4-methyl-           | Mesitylene                      |
| Benzene, 1-methyl-4-(1-methylethenyl)- | Naphthalene                     |
| Benzene, 1-methyl-4-propyl-            | Naphthalene, 1,7-dimethyl-      |
| Benzene, 1-propenyl-                   | o-Xylene                        |
| Benzene, 2-propenyl-                   | p-Cresol                        |
| Benzene, heptyl-                       | Phenol                          |
| Benzene, hexyl-                        | Phenol, 2,3-dimethyl-           |
| Benzene, octyl-                        | Phenol, 2,6-dimethyl-           |
| Benzene, pentyl-                       | Phenol, 2-ethyl-                |
| Benzene, propyl-                       | Phenol, 2-methyl-               |
| Benzene, tetradecyl-                   | Phenol, 3-methyl-               |
| Ethanone, 1-(3-hydroxyphenyl)-         | Phenol, 4-ethyl-                |
| Ethylbenzene                           | Phenol, 4-ethyl-2-methyl-       |
| Fluorene                               | Phenol, 4-ethyl-3-methyl-       |
| Hydroquinone                           | p-Xylene                        |
| Indane                                 | Styrene                         |

**Carbohydrates**

|                                              |                              |
|----------------------------------------------|------------------------------|
| 2-Nonadecanone                               | 2-Heptadecanone              |
| 1,2-Cyclopentanedione, 3-methyl-             | 2H-Pyran-2-one, 5,6-dihydro- |
| 1,4:3,6-Dianhydro- $\alpha$ -D-glucopyranose | 2-Nonanone                   |
| 1-Penten-3-one                               | 2-Pentadecanone              |
| 2(3H)-Furanone, 5-acetyldihydro-             | 2-Propanone, 1-(acetyloxy)-  |
| 2(3H)-Furanone, 5-methyl-                    | 2-Tridecanone                |

|                                      |                          |
|--------------------------------------|--------------------------|
| 2(3H)-Furanone, dihydro-3-methylene- | 2-Undecanone             |
| 2(5H)-Furanone, 5-methyl-            | 2-Vinylfuran             |
| 2,3-Pentanedione                     | 3-Buten-2-one, 3-methyl- |
| 2,4(3H,5H)-Furandione, 3-ethyl-      | 3-Furaldehyde            |
| 2,5-Furandicarboxaldehyde            | 3-Penten-2-one           |
| 2-Cyclopenten-1-one                  | 4-Cyclopentene-1,3-dione |
| 2-Cyclopenten-1-one, 2,3-dimethyl-   | 5-Hydroxymethylfurfural  |
| 2-Cyclopenten-1-one, 2-methyl-       | 6H-Dibenzo[b,d]-pyran    |
| 2-Cyclopenten-1-one, 3-methyl-       | Benzofuran               |
| 2-Furancarboxaldehyde, 5-methyl-     | Benzofuran, 2,3-dihydro- |
| Benzofuran, 2-methyl-                | Furan, 2-ethyl-          |
| Cyclobutanone, 2,2-dimethyl-         | Furan, 2-methyl-         |
| Cyclohexanone                        | Furan, 2-propyl-         |
| Cyclopentanone                       | Furan, 3-methyl-         |
| Dibenzofuran                         | Furaneol                 |
| Dihydro-2(3H)-thiophenone            | Furfural                 |
| Ethanone, 1-(2-furanyl)-             | Levoglucosenone          |
| Furan, 2,5-dimethyl-                 | Maleic anhydride         |

---

#### ***Lignins & Lignin-derived compounds***

|                                        |                                              |
|----------------------------------------|----------------------------------------------|
| 2-Methoxy-4-vinylphenol                | Ethanone, 1-(4-hydroxy-3,5-dimethoxyphenyl)- |
| 3-Methoxy-5-methylphenol               | Phenol, 2,6-dimethoxy-                       |
| Apocynin                               | Phenol, 2,6-dimethoxy-4-(2-propenyl)-        |
| Benzaldehyde                           | Phenol, 2-methoxy-                           |
| Benzaldehyde, 3-hydroxy-               | Phenol, 2-methoxy-4-(1-propenyl)-            |
| Benzaldehyde, 4-hydroxy-               | Phenol, 4-ethenyl-2,6-dimethoxy-             |
| Benzaldehyde, 4-hydroxy-3,5-dimethoxy- | Phenol, 4-ethyl-2-methoxy-                   |
| Creosol                                | Vanillin                                     |

---

#### ***Lipids***

|                        |                        |
|------------------------|------------------------|
| 1,2-Nonadiene          | 1-Pentadecene          |
| 1,3,5-Cycloheptatriene | 1-Tetradecene          |
| 1,3,8-p-Menthatriene   | 1-Tricosene            |
| 10-Heneicosene (c,t)   | 1-Tridecene            |
| 1-Docosene             | 1-Undecene             |
| 1-Dodecanol, 2-octyl-  | 2,4-Dimethyl-1-heptene |



|                                     |                                                   |
|-------------------------------------|---------------------------------------------------|
| 1-Dodecene                          | 2,6,10-Trimethyltridecane                         |
| 1-Heptacosanol                      | 2-Butanone, 1-(acetyloxy)-                        |
| 1-Heptadecene                       | 2-Butenal, (E)-                                   |
| 1-Hexacosanol                       | 2-Propenal                                        |
| 1-Hexacosene                        | 2-Tridecene, (E)-                                 |
| 1-Hexadecanol                       | 3-Eicosene, (E)-                                  |
| 1-Hexadecene                        | 3-Methyl-2-furoic acid                            |
| 1-Hexanol                           | cis-13-Eicosenoic acid                            |
| 1-Nonadecene                        | Cycloeicosane                                     |
| 1-Nonene                            | Cyclohexadecane                                   |
| 1-Octadecene                        | Cyclohexene                                       |
| Cyclopropane, 1,2-dimethyl-, trans- | n-Hexadecanoic acid                               |
| Cyclotetracosane                    | Nonadecane                                        |
| Decane                              | Nonane                                            |
| Docosane                            | Octacosanol                                       |
| Docosanoic acid, methyl ester       | Octadecane                                        |
| Dodecanal                           | Octane                                            |
| Dodecane                            | Pentacosane                                       |
| Dodecane, 2,6,10-trimethyl-         | Pentadecane                                       |
| Eicosane                            | Propanoic acid, 2-hydroxy-2-methyl-, methyl ester |
| Erucic acid                         | Propanoic acid, anhydride                         |
| Heneicosane                         | Tetradecane                                       |
| Heptacosane                         | Tetradecanoic acid                                |
| Heptadecane                         | Tricosane                                         |
| Hexacosane                          | Tridecane                                         |
| Hexadecane                          | Tridecane, 7-methylene-                           |
| Hexanedioic acid, dioctyl ester     | Undecane                                          |
| Neophytadiene                       | Undecane, 3-methyl-                               |

---

***N-containing substances***

|                           |                           |
|---------------------------|---------------------------|
| 1H-Imidazole              | 4-Pyridinone              |
| 1H-Pyrrole, 1-ethyl-      | Acetamide, N-4-pyridinyl- |
| 1H-Pyrrole, 1-methyl-     | Benzenepropanenitrile     |
| 1H-Pyrrole, 2,4-dimethyl- | Benzonitrile              |
| 1H-Pyrrole, 2,5-dimethyl- | Benzonitrile, 3-methyl-   |

|                                 |                          |
|---------------------------------|--------------------------|
| 1H-Pyrrole, 2-methyl-           | Benzyl nitrile           |
| 1H-Pyrrole, 3-methyl-           | Difluoramine             |
| 1H-Pyrrole-2-carboxaldehyde     | Ethyl isocyanide         |
| 1H-Pyrrole-3-carbonitrile       | Formic acid hydrazide    |
| 2(1H)-Pyridinone, 3-methyl-     | Hydrazine, 1,1-dipropyl- |
| 2,3-Pyridinedicarbonitrile      | Hydrazine, trimethyl-    |
| 2,5-Pyrrolidinedione, 1-methyl- | Indole                   |
| 2-Amino-4-methylpyrimidine      | Indole, 3-methyl-        |
| 2H-Indol-2-one, 1,3-dihydro-    | Phenol, 4-amino-         |
| 2-Naphthalenamine               | Propanenitrile           |
| 4-Aminopyrimidine               | Pyridine                 |
| Pyridine, 2,3-dimethyl-         | Pyridine, 4-methyl-      |
| Pyridine, 2,5-dimethyl-         | Pyrrole                  |
| Pyridine, 2-methyl-             | s-Triazole, 3-acetamido- |
| Pyridine, 3-methoxy-            | Succinimide              |
| Pyridine, 3-methyl-             | Urea, methyl-            |

---

***Compounds of General & Unknown Origin***

Cyclononasiloxane, octadecamethyl-

|         |          |
|---------|----------|
| Peak_3  | Peak_72  |
| Peak_4  | Peak_77  |
| Peak_6  | Peak_81  |
| Peak_8  | Peak_85  |
| Peak_11 | Peak_87  |
| Peak_13 | Peak_91  |
| Peak_17 | Peak_95  |
| Peak_19 | Peak_97  |
| Peak_22 | Peak_101 |
| Peak_23 | Peak_111 |
| Peak_25 | Peak_112 |
| Peak_26 | Peak_115 |
| Peak_29 | Peak_122 |
| Peak_30 | Peak_127 |
| Peak_33 | Peak_131 |
| Peak_34 | Peak_138 |

|          |          |
|----------|----------|
| Peak_35  | Peak_145 |
| Peak_36  | Peak_153 |
| Peak_37  | Peak_158 |
| Peak_42  | Peak_160 |
| Peak_45  | Peak_161 |
| Peak_46  | Peak_173 |
| Peak_51  | Peak_184 |
| Peak_55  | Peak_186 |
| Peak_58  | Peak_190 |
| Peak_61  | Peak_196 |
| Peak_64  | Peak_200 |
| Peak_210 | Peak_469 |
| Peak_215 | Peak_471 |
| Peak_221 | Peak_476 |
| Peak_238 | Peak_477 |
| Peak_243 | Peak_479 |
| Peak_261 | Peak_481 |
| Peak_275 | Peak_490 |
| Peak_277 | Peak_498 |
| Peak_283 | Peak_500 |
| Peak_286 | Peak_508 |
| Peak_287 | Peak_540 |
| Peak_299 | Peak_542 |
| Peak_306 | Peak_562 |
| Peak_310 | Peak_565 |
| Peak_315 | Peak_566 |
| Peak_320 | Peak_571 |
| Peak_321 | Peak_573 |
| Peak_335 | Peak_574 |
| Peak_345 | Peak_589 |
| Peak_350 | Peak_591 |
| Peak_358 | Peak_594 |
| Peak_366 | Peak_595 |
| Peak_368 | Peak_599 |
| Peak_382 | Peak_620 |

|          |           |
|----------|-----------|
| Peak_409 | Peak_627  |
| Peak_413 | Peak_635  |
| Peak_425 | Peak_641  |
| Peak_427 | Peak_642  |
| Peak_430 | Peak_643  |
| Peak_437 | Peak_651  |
| Peak_446 | Peak_668  |
| Peak_447 | Peak_672  |
| Peak_448 | Peak_676  |
| Peak_467 | Peak_677  |
| Peak_468 | Peak_682  |
| Peak_683 | Peak_929  |
| Peak_696 | Peak_931  |
| Peak_711 | Peak_934  |
| Peak_727 | Peak_938  |
| Peak_731 | Peak_952  |
| Peak_738 | Peak_953  |
| Peak_741 | Peak_959  |
| Peak_745 | Peak_978  |
| Peak_748 | Peak_988  |
| Peak_760 | Peak_991  |
| Peak_771 | Peak_997  |
| Peak_785 | Peak_998  |
| Peak_786 | Peak_1007 |
| Peak_787 | Peak_1013 |
| Peak_800 | Peak_1024 |
| Peak_803 | Peak_1036 |
| Peak_807 | Peak_1039 |
| Peak_808 | Peak_1057 |
| Peak_820 | Peak_1059 |
| Peak_822 | Peak_1075 |
| Peak_825 | Peak_1088 |
| Peak_834 | Peak_1092 |
| Peak_837 | Peak_1095 |
| Peak_839 | Peak_1121 |

|           |           |
|-----------|-----------|
| Peak_840  | Peak_1125 |
| Peak_841  | Peak_1139 |
| Peak_846  | Peak_1141 |
| Peak_849  | Peak_1144 |
| Peak_858  | Peak_1151 |
| Peak_874  | Peak_1155 |
| Peak_880  | Peak_1157 |
| Peak_883  | Peak_1159 |
| Peak_887  | Peak_1165 |
| Peak_915  | Peak_1166 |
| Peak_916  | Peak_1171 |
| Peak_1175 | Peak_1348 |
| Peak_1193 | Peak_1349 |
| Peak_1194 | Peak_1355 |
| Peak_1198 | Peak_1357 |
| Peak_1199 | Peak_1383 |
| Peak_1207 | Peak_1406 |
| Peak_1214 | Peak_1408 |
| Peak_1217 | Peak_1417 |
| Peak_1226 | Peak_1419 |
| Peak_1231 | Peak_1422 |
| Peak_1232 | Peak_1424 |
| Peak_1235 | Peak_1438 |
| Peak_1237 | Peak_1444 |
| Peak_1241 | Peak_1450 |
| Peak_1245 | Peak_1462 |
| Peak_1246 | Peak_1466 |
| Peak_1253 | Peak_1467 |
| Peak_1265 | Peak_1468 |
| Peak_1274 | Peak_1470 |
| Peak_1279 | Peak_1472 |
| Peak_1283 | Peak_1479 |
| Peak_1286 | Peak_1481 |
| Peak_1288 | Peak_1485 |
| Peak_1290 | Peak_1488 |

|           |           |
|-----------|-----------|
| Peak_1292 | Peak_1492 |
| Peak_1293 | Peak_1497 |
| Peak_1294 | Peak_1500 |
| Peak_1301 | Peak_1503 |
| Peak_1305 | Peak_1508 |
| Peak_1310 | Peak_1509 |
| Peak_1314 | Peak_1522 |
| Peak_1317 | Peak_1525 |
| Peak_1323 | Peak_1529 |
| Peak_1332 | Peak_1531 |
| Peak_1336 | Peak_1532 |
| Peak_1548 | Peak_1678 |
| Peak_1549 | Peak_1679 |
| Peak_1552 | Peak_1684 |
| Peak_1563 | Peak_1685 |
| Peak_1566 | Peak_1691 |
| Peak_1571 | Peak_1696 |
| Peak_1579 | Peak_1709 |
| Peak_1584 | Peak_1716 |
| Peak_1586 | Peak_1717 |
| Peak_1589 | Peak_1720 |
| Peak_1599 | Peak_1723 |
| Peak_1600 | Peak_1724 |
| Peak_1607 | Peak_1726 |
| Peak_1608 | Peak_1742 |
| Peak_1614 | Peak_1743 |
| Peak_1638 | Peak_1751 |
| Peak_1645 | Peak_1754 |
| Peak_1651 | Peak_1760 |
| Peak_1657 | Peak_1762 |
| Peak_1663 | Peak_1764 |
| Peak_1664 | Peak_1766 |
| Peak_1665 | Peak_1768 |

**Supplementary Table 4.:** Correlations between SOM compound groups abundances and soil C content.

| Compound Class (mg C g <sup>-1</sup> DW) | Soil C (mg g <sup>-1</sup> DW)                          |
|------------------------------------------|---------------------------------------------------------|
| Aromatics & Phenols                      | $\rho$ (79) = 0.92; <b>p = &lt; 2.2 e<sup>-16</sup></b> |
| Carbohydrates                            | $\rho$ (79) = 0.95; <b>p = &lt; 2.2 e<sup>-16</sup></b> |
| General & Unknown                        | $\rho$ (79) = 0.92; <b>p = &lt; 2.2 e<sup>-16</sup></b> |
| Lignins                                  | $\rho$ (79) = 0.77; <b>p = &lt; 2.2 e<sup>-16</sup></b> |
| Lipids                                   | $\rho$ (79) = 0.90; <b>p = &lt; 2.2 e<sup>-16</sup></b> |
| N- Containing                            | $\rho$ (79) = 0.98; <b>p = &lt; 2.2 e<sup>-16</sup></b> |

*Presented are the Spearman's rank-order correlation coefficient rho ( $\rho(df)$ ) and respective p-values (two-sided test).*

(a)

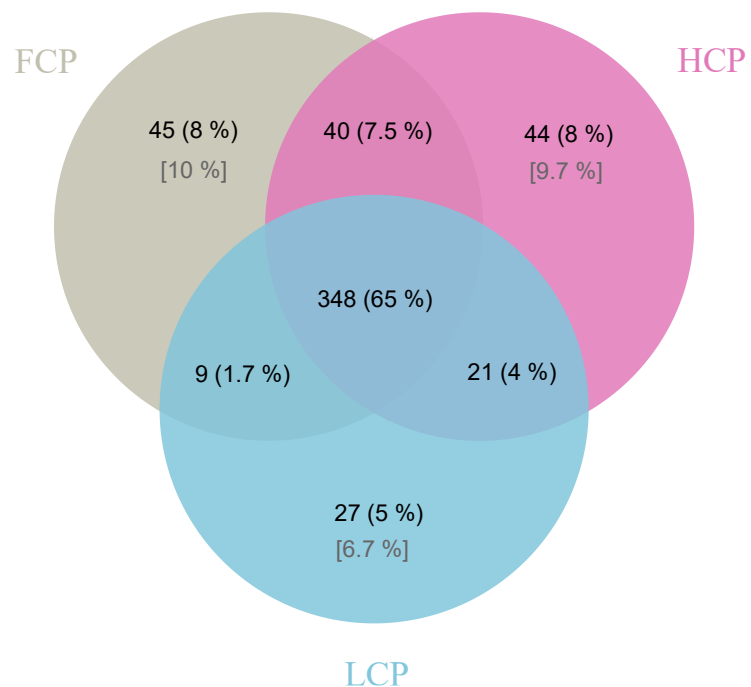

(b)

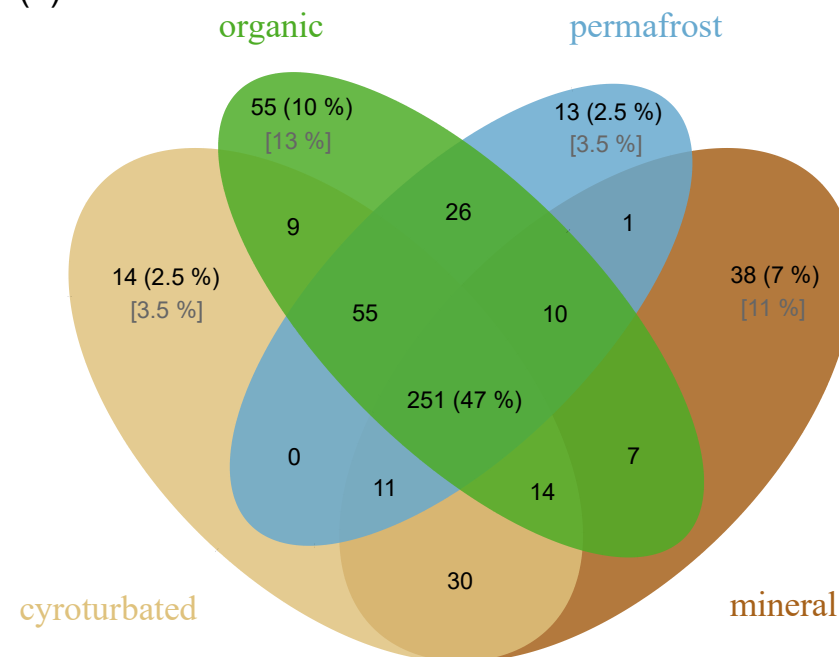

**Supplementary Figure 2.:** Venn Diagrams depicting the number of shared and unique pyrolysis products among investigated (a) ice-wedge polygon types ( $n_{LCP}=20$ ,  $n_{FPT}=32$ ,  $n_{HCP}=29$ ), and (b) soil layer categories ( $n_{organic}=35$ ;  $n_{mineral}=14$ ;  $n_{cryoturbated}=13$ ,  $n_{permafrost}=19$ ). Fractions of the shared and unique pyrolysis products from the total number of substances ( $n=534$ ) are given in (%). Relative proportion of polygon-specific/soil layer-specific pyrolysis products relative to the total pyrolysis products per polygon type/ soil layer (grey) are given in [%].



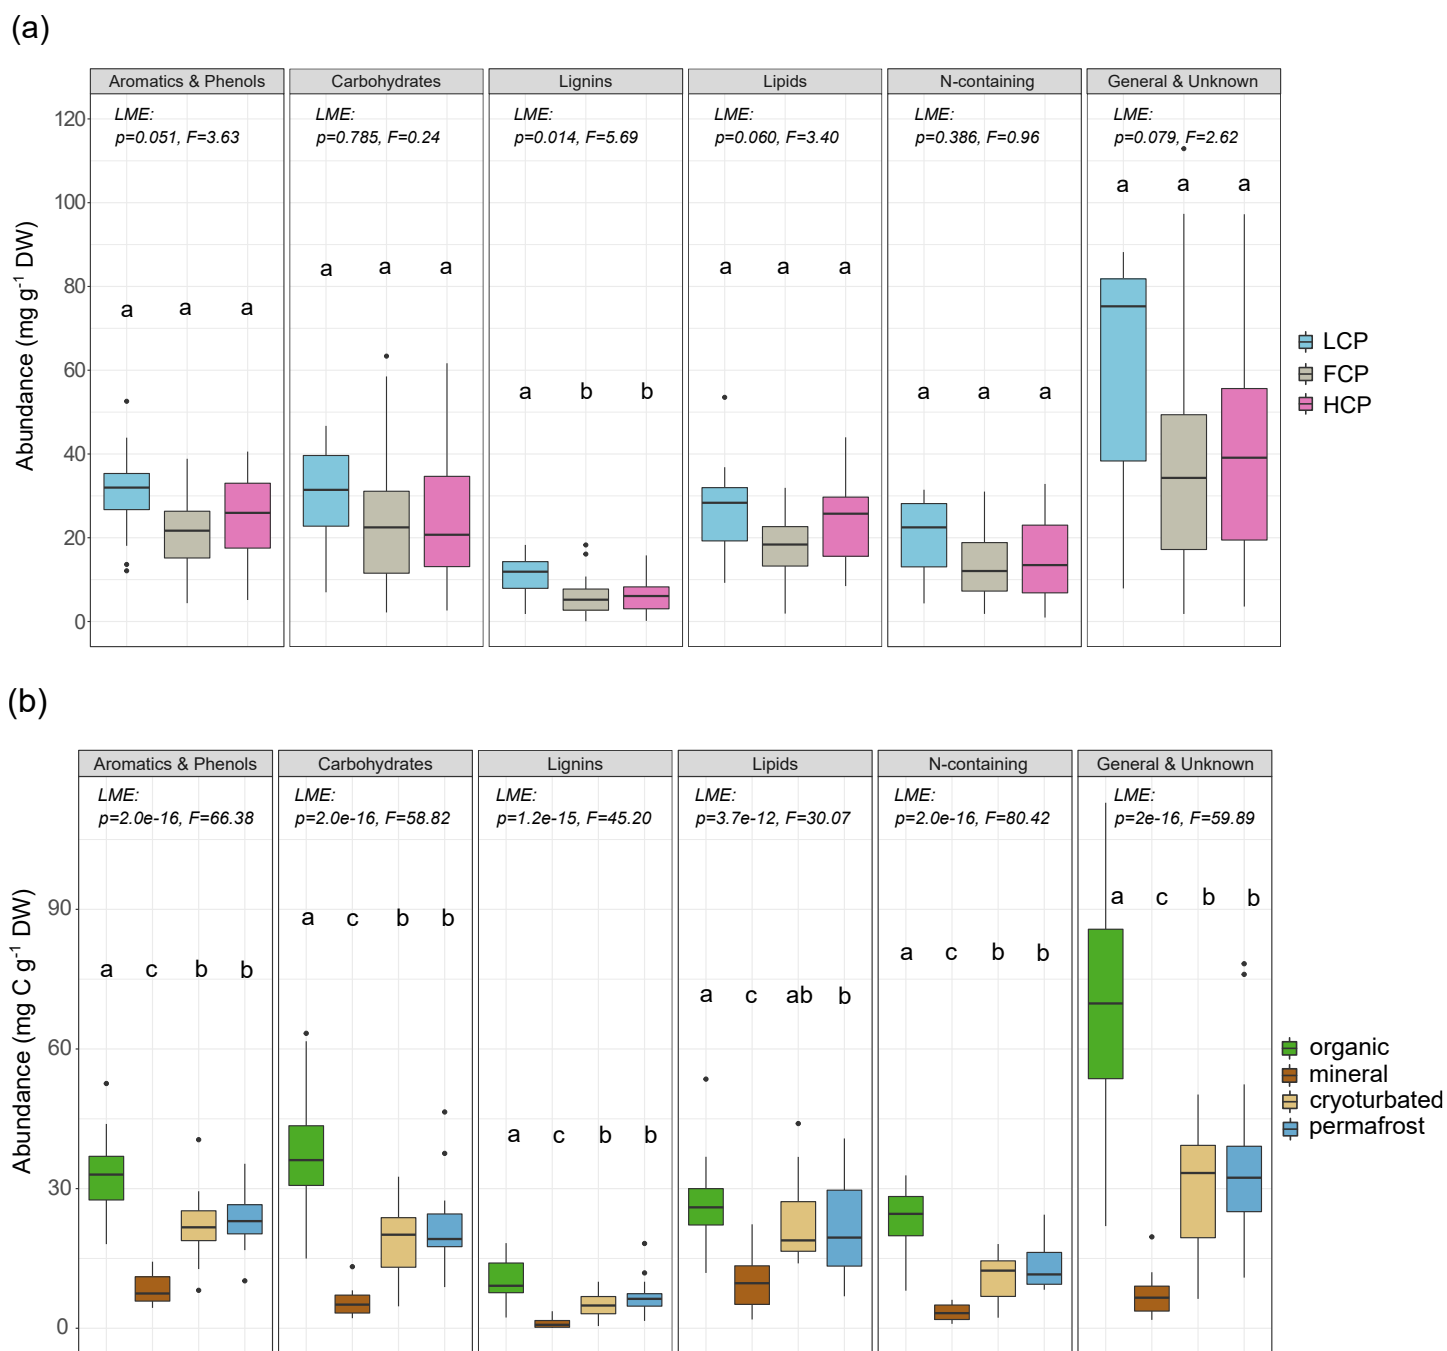

**Supplementary Figure 3.:** Absolute abundances ( $\text{mg g}^{-1} \text{DW}$ ) of SOM compound groups in investigated ice-wedge polygon types ( $n_{\text{LCP}}=20$ ,  $n_{\text{FCP}}=32$ ,  $n_{\text{HCP}}=29$ ) and (b) soil layer categories ( $n_{\text{organic}}=35$ ;  $n_{\text{mineral}}=14$ ;  $n_{\text{cryoturbated}}=13$ ,  $n_{\text{permafrost}}=19$ ). Statistical results from linear mixed-effects models (Type II ANOVA  $p$ -values and  $F$ -statistics) are shown in respective panels. Pairwise comparisons (Tukey-adjusted emmeans) are indicated by letter groupings. No interactive effects between polygon type and soil layer category were observed.

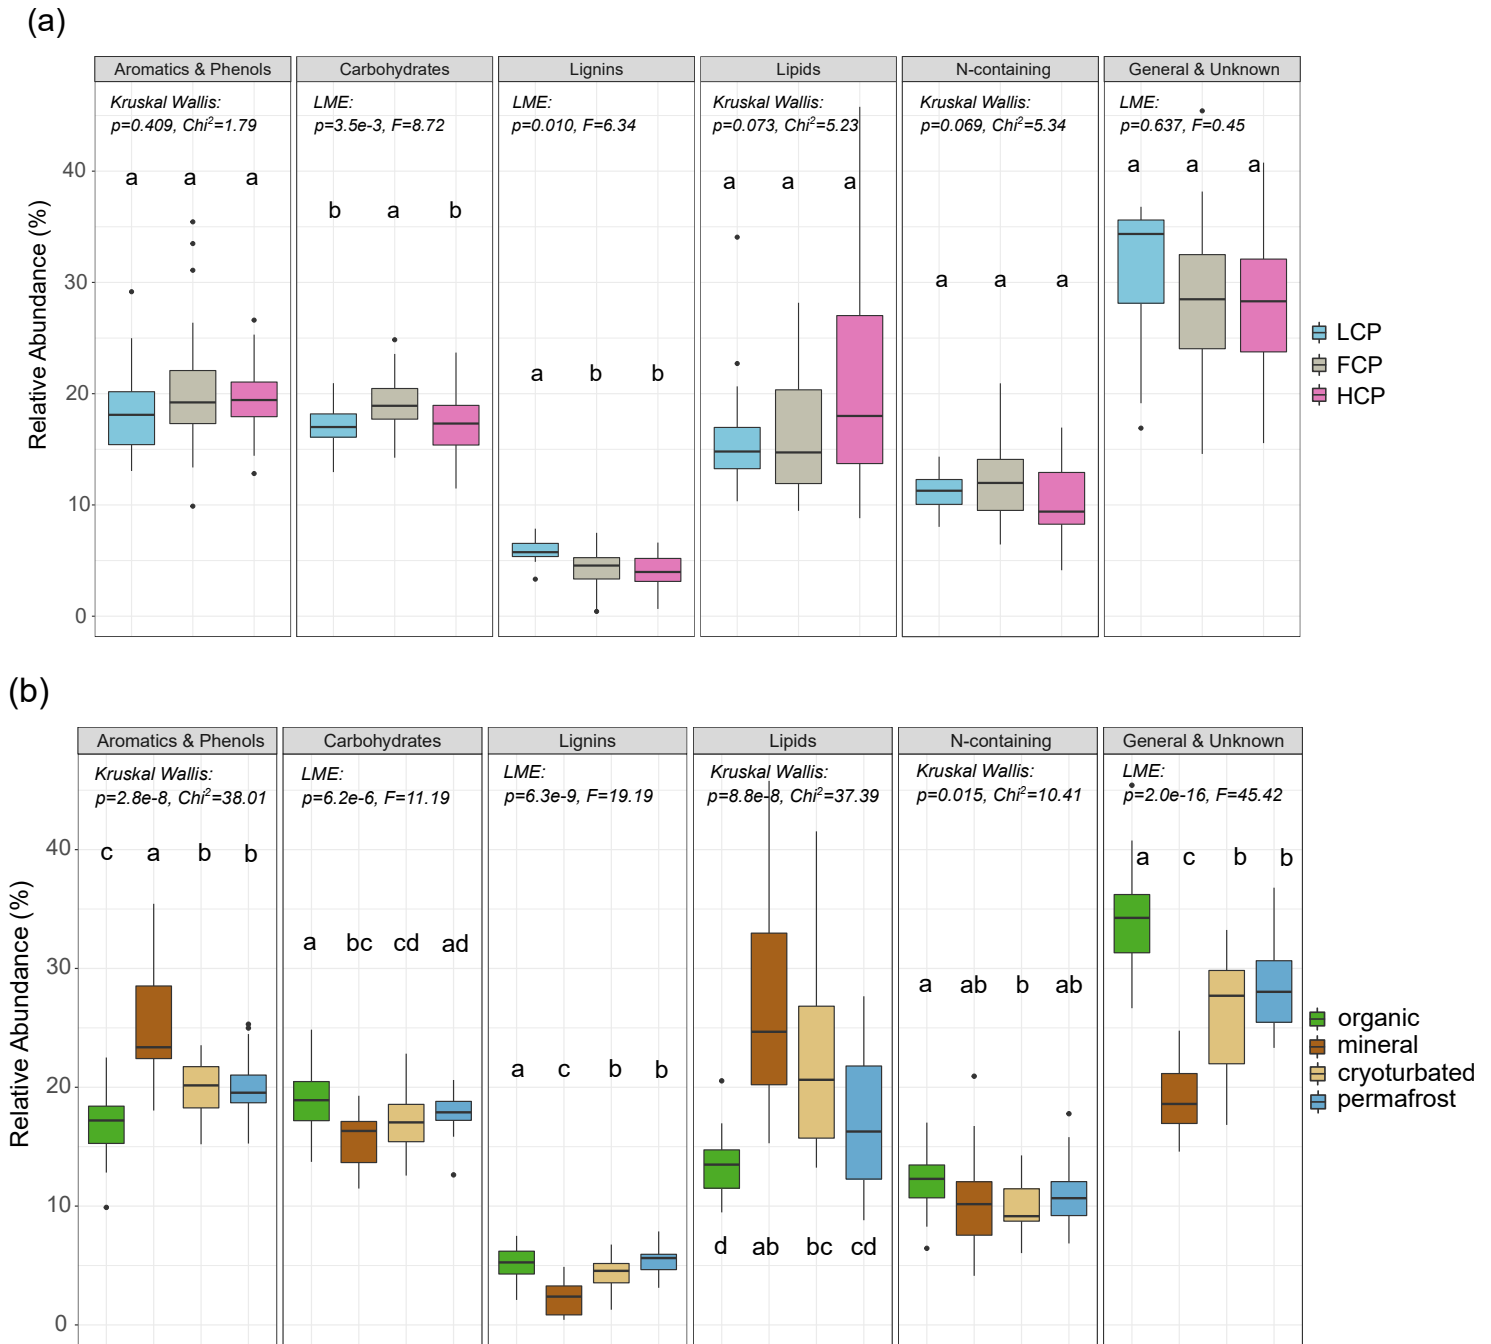

**Supplementary Figure 4.:** Relative abundances (%) of SOM compound groups in investigated ice-wedge polygon types ( $n_{LCP}=20$ ,  $n_{FPT}=32$ ,  $n_{HCP}=29$ ) and (b) soil layer categories ( $n_{organic}=35$ ;  $n_{mineral}=14$ ;  $n_{cryoturbated}=13$ ,  $n_{permafrost}=19$ ). Statistical results from linear mixed-effects models (Type II ANOVA  $p$ -values and  $F$ -statistics) are shown in respective panels. When model assumptions were not met, Kruskal–Wallis tests were used ( $p$ -values and  $\chi^2$  statistics). Pairwise comparisons (Tukey-adjusted emmeans or Bonferroni-adjusted pairwise Wilcoxon tests) are indicated by letter groupings in brackets. No interactive effects between polygon type and soil layer category were observed.

## Section 4: Soil microbial communities

Microbial DNA was extracted using the FastDNA™ SPIN Kit for Soil (MP Biomedicals, Santa Ana, USA) following to the manufacturers' instructions but minor modifications for cleaning the samples from the RNeasy™ Stabilization Solution. We therefore added 1 ml sodium phosphate buffer (contained in the kit) and vortexed gently. After a short centrifugation step, we discarded the supernatant without disturbing the soil pellet and repeated the procedure five consecutive times. We followed the conventional DNA extraction protocol subsequently. Due to the large differences in bulk density, soil C and the assumed discrepancy in microbial biomass between the organic layer and the other layers, we used 250 mg FW soil from the organic topsoil and 400 mg FW soil from all other soil layers respectively. To control for potential contamination, extraction blanks were included and subjected to subsequent quantification and sequencing steps. DNA extracts were treated with the OneStep PCR Inhibitor Removal Kit (Zymo Research, Irvine, CA, USA) to remove possibly occurring inhibitory polyphenolics, humic- and fulvic acids, and tannins. DNA concentrations were quantified using the Quant-iT™ PicoGreen® dsDNA Assay Kit (Thermo Fisher Scientific, Waltham, USA).

Amplicon sequencing and raw data processing was performed at the Joint Microbiome Facility of the Medical University of Vienna and the University of Vienna (JMF project ID JMF-2008-5). Datasets are deposited in the NCBI Sequence Read Archive under BioProject accession number (PRJNA1274918). We used DNA extracts that have been normalized to a concentration of 0.5 ng  $\mu\text{l}^{-1}$ . A two-step barcoding approach was employed to generate amplicon libraries of archaeal, bacterial, and fungal communities using Illumina MiSeq (V3 Kit) in the 2 x 300 bp configuration (Pjevac et al., 2021). The V4 hypervariable region of the 16S rRNA gene was amplified using primer pairs 515F (GTGYCAGCMGCCGCGGTAA, Parada et al., 2016) and 806R (GGAACNVGGGTWTCTAAT, Apprill et al., 2015). The fungal ITS1 region was amplified using primer pairs ITS1F (CTTGGTCATTTAGAGGAAGTAA, Smith and Peay, 2014) and ITS2 (GCTGCGTTCTTCATCGATGC, White et al., 1990). First-step 25  $\mu\text{l}$  PCR reactions consisted of 1x DreamTaq Green PCR master mix, 0.1  $\mu\text{g}$   $\mu\text{l}^{-1}$  BSA, 0.25  $\mu\text{mol}$   $\text{l}^{-1}$  of each headed primer, and 2  $\mu\text{l}$  of DNA template. We used the following amplification conditions:

- 16S rRNA gene: initial denaturation at 94 °C for 3 min, followed by 30 cycles of 94 °C for 45 s, 52 °C for 60 s and 72 °C for 60 s, and final elongation at 72 °C for 10 min.
- ITS1 region: 94 °C for 1 min, 35 cycles of 94 °C for 45 s, 52 °C for 60 s and 72 °C for 90 s, followed by final elongation at 72 °C for 10 min.

Digital droplet PCR (ddPCR) was performed to quantify 16S rRNA genes and ITS1 regions with the same primers used for sequencing. Each ddPCR reaction had a volume of 22  $\mu$ L and consisted of 1x QX200 ddPCR EvaGreen Supermix (BioRad), 0.1  $\mu$ mol L<sup>-1</sup> of each primer and 0.5 ng of template for the quantification of 16S rRNA genes or ITS1 regions, respectively. Droplets were generated on a QX200™ Droplet Generator (BioRad) and immediately subjected to PCR amplification (amplification conditions in Supplementary Table 5). PCR products in droplets were kept at 4 °C over night to increase their separation before measuring their fluorescence intensity on a QX200™ Droplet Reader (BioRad). Gene copy numbers were calculated using the QX ONE Software Standard Edition (v. 1.2, BioRad) where thresholds between positive and negative droplet populations were set consistently for each sample using the histogram as a guide. We expressed final ddPCR results as 16S rRNA and ITS1 gene copy numbers g<sup>-1</sup> DW soil and used them as abundance proxies for bacteria and archaea, and fungi, respectively.

Prior downstream analyses, we cleaned the amplicon sequencing datasets from non-archaeal, -bacterial, or -fungal sequences and excluded samples with less than 500 obtained reads. Further, we corrected for possible contaminations during DNA extraction by subtracting the highest ASV-specific read number observed in the DNA extraction blanks from the corresponding ASV read number in the samples.

The resulting unfiltered count-datasets of bacterial and archaeal, and fungal reads were used to assess alpha-diversity after rarefaction (we used the `rarefy_even_depth()`-function implemented in phyloseq, with the determined cut-offs at 2650 16S rRNA reads and at 543 ITS1 reads, respectively). We assessed alpha-diversity as richness (number of observed ASVs) and Shannon diversity.

We calculated abundances of individual ASVs (gene copy number corrected reads g<sup>-1</sup> soil DW) by multiplying the 16S rRNA or ITS gene copy numbers measured in ddPCR assays with their respective relative abundances from the amplicon sequencing datasets. We discarded rare (bacterial, archaeal, and fungal) ASVs, defined as containing less than 0.05 % of all gene copy number corrected reads per sample. This resulted in 3643 bacterial and 137 archaeal ASVs (classified into 47 phyla, 111 classes, 201 orders, 247 families, and 308 genera) and 1604 fungal ASVs (classified into 7 phyla, 19 classes, 44 orders, 77 families and 101 genera) being considered in final analyses. For investigating the microbial community composition ( $\beta$ -diversity), we performed Principal Component Analyses (PCA) on center-log-ratio (clr) – transformed bacterial and archaeal, or fungal gene copy number corrected reads g<sup>-1</sup> DW (Aitchinson distance). We used ddPCR-derived abundance data (gene copy number corrected reads g<sup>-1</sup> DW) to explore quantitative differences of certain phyla between polygon types and soil layer categories.

| Temperature                                 | Time  | Cycles | Details           | Comments                                           |
|---------------------------------------------|-------|--------|-------------------|----------------------------------------------------|
| 16S rRNA ddPCR quantification conditions    |       |        |                   |                                                    |
| 95 °C                                       | 5 min |        |                   | add a temperature ramp of 2 °C/second to all steps |
| 95 °C                                       | 30 s  | x 5    | -1 °C every cycle |                                                    |
| 57 °C                                       | 120 s |        |                   |                                                    |
| 95 °C                                       | 30 s  | x 35   |                   |                                                    |
| 52 °C                                       | 120 s |        |                   |                                                    |
| 4 °C                                        | 5 min |        |                   |                                                    |
| 90 °C                                       | 5 min |        |                   |                                                    |
| 4 °C                                        | hold  |        |                   |                                                    |
| ITS1 Region ddPCR quantification conditions |       |        |                   |                                                    |
| 95 °C                                       | 5 min |        |                   | add a temperature ramp of 2°C/second to all steps  |
| 95 °C                                       | 30 s  | x 5    | -1 °C every cycle |                                                    |
| 60 °C                                       | 120 s |        |                   |                                                    |
| 95 °C                                       | 30 s  | x 35   |                   |                                                    |
| 55 °C                                       | 120 s |        |                   |                                                    |
| 4 °C                                        | 5 min |        |                   |                                                    |
| 90 °C                                       | 5 min |        |                   |                                                    |
| 4 °C                                        | hold  |        |                   |                                                    |

**Supplementary Table 6(a).**: Microbial richness, diversity, and abundance among investigated ice-wedge polygon types.

| Bacteria & Archaea                                             | LCP                                            | FCP                                            | HCP                                                           | Polygon Type Effect                       |
|----------------------------------------------------------------|------------------------------------------------|------------------------------------------------|---------------------------------------------------------------|-------------------------------------------|
| Richness<br>(No. ASVs)                                         | 494 ± 35 (b)                                   | 585 ± 33 (a) <sub>[n=30]</sub>                 | 566 ± 38 (a)                                                  | <b>p = 0.013</b> (F = 6.1)                |
| Diversity<br>(Shannon Index)                                   | 4.95 ± 0.16 (b)                                | 5.41 ± 0.1 (a) <sub>[n=30]</sub>               | 5.26 ± 0.13 (a)                                               | <b>p = 2.2 e<sup>-3</sup></b> (F = 10.9)  |
| Abundance<br>(16S rRNA Gene Copies g <sup>-1</sup> DW)         | 1.51e <sup>9</sup> ± 4.24e <sup>8</sup> (*int) | 2.61e <sup>9</sup> ± 4.42e <sup>8</sup> (*int) | 2.44e <sup>9</sup> ± 4.48e <sup>8</sup> (*int)                | p = 0.116 (Chi <sup>2</sup> = 4.3)        |
| Abundance<br>(16S rRNA Gene copies mg <sup>-1</sup> soil C)    | 4.21e <sup>6</sup> ± 8.79e <sup>5</sup> (b)    | 1.20e <sup>7</sup> ± 1.40e <sup>6</sup> (a)    | 9.98e <sup>6</sup> ± 1.28e <sup>6</sup> (a)                   | <b>p = 1.6 e<sup>-4</sup></b> (F = 16.6)  |
| Fungi                                                          |                                                |                                                |                                                               |                                           |
| Richness<br>(No. ASVs)                                         | 30 ± 3 (b) <sub>[n=19]</sub>                   | 43 ± 4 (a) <sub>[n=30]</sub>                   | 44 ± 4 (a)                                                    | <b>p = 5.9 e<sup>-3</sup></b> (F = 7.0)   |
| Diversity<br>(Shannon Index)                                   | 1.75 ± 0.19 (b) <sub>[n=19]</sub>              | 2.28 ± 0.15 (a) <sub>[n=30]</sub>              | 2.16 ± 0.16 (ab)                                              | <b>p = 0.054</b> (F = 3.5)                |
| Abundance<br>(ITS1 Gene Region Copies g <sup>-1</sup> DW)      | 1.05e <sup>7</sup> ± 4.02e <sup>6</sup> (*int) | 7.26e <sup>7</sup> ± 2.84e <sup>7</sup> (*int) | 1.08e <sup>8</sup> ± 4.78e <sup>7</sup> (*int)                | p = 0.196 (Chi <sup>2</sup> = 3.3)        |
| Abundance<br>(ITS1 Gene Region Copies mg <sup>-1</sup> soil C) | 2.67e <sup>4</sup> ± 8.88e <sup>3</sup> (b)    | 2.03e <sup>5</sup> ± 6.39e <sup>4</sup> (a)    | 1.90e <sup>5</sup> ± 5.70e <sup>4</sup> (a) <sub>[n=28]</sub> | <b>p = 0.019</b> (Chi <sup>2</sup> = 8.0) |

Presented are means ± standard error ( $n_{LCP}=20$ ,  $n_{FPT}=32$ ,  $n_{HCP}=29$ ; individual deviations noted in the table). Statistical results from linear mixed-effects models (Type II ANOVA *p*-values and *F*-statistics) are shown in the right column. When model assumptions were not met, Kruskal Wallis tests were used (*p*-values and Chi<sup>2</sup> statistics). Pairwise comparisons (Tukey-adjusted emmeans or Bonferroni-adjusted pairwise Wilcoxon tests) are indicated by letter groupings in brackets. Significant interactions between polygon type and soil layer are marked with (\*int).

**Interactive effects:**

**Bacterial and archaeal abundance (16S rRNA gene copies g<sup>-1</sup> DW)** was significantly lower in the organic layer of LCPs compared to FCPs and HCPs (Kruskal Wallis:  $p = 0.019$ ,  $\text{Chi}^2 = 7.92$ ; pairwise Wilcoxon: LCP vs. FCP  $p = 0.079$ , LCP vs. HCP  $p = 0.032$ ). In the permafrost layer, bacterial and archaeal abundance was also significantly lower in LCPs than FCPs (Kruskal Wallis test:  $p = 0.011$ ,  $\text{Chi}^2 = 8.94$ ; pairwise Wilcoxon: LCP vs. FCP  $p = 0.010$ ).

**Fungal abundance (ITS1 gene region copies g<sup>-1</sup> DW)** was significantly lower in the organic layer of LCPs compared to FCPs and HCPs (Kruskal Wallis:  $p = 3.51 \times 10^{-4}$ ,  $\text{Chi}^2 = 15.91$ ; pairwise Wilcoxon: LCP vs. FCP  $p = 0.013$ , LCP vs. HCP  $p = 4.6 \times 10^{-4}$ ).

**Supplementary Table 6(b).**: Microbial richness, diversity, and abundance among investigated soil layer categories.

| Bacteria & Archaea                                              | organic                                            | mineral                                        | cryoturbated                                          | permafrost                                     | Soil Layer Effect                                      |
|-----------------------------------------------------------------|----------------------------------------------------|------------------------------------------------|-------------------------------------------------------|------------------------------------------------|--------------------------------------------------------|
| Richness<br>(No. ASV)                                           | 702 ± 26 (a)                                       | 527 ± 37 (b)                                   | 452 ± 20 (bc) [n=11]                                  | 367 ± 16 (c)                                   | <b>p &lt; 2e<sup>-16</sup></b> (F = 54.4)              |
| Diversity<br>(Shannon Index)                                    | 5.72 ± 0.07 (a)                                    | 5.22 ± 0.13 (b)                                | 4.91 ± 0.08 (bc) [n=11]                               | 4.55 ± 0.12 (c)                                | <b>p &lt; 5.9e<sup>-16</sup></b> (F = 50.8)            |
| Abundance<br>(16S rRNA Gene Copies g <sup>-1</sup> DW)          | 3.94e <sup>9</sup> ± 4.44e <sup>8</sup> (*int)     | 4.77e <sup>8</sup> ± 8.95e <sup>7</sup> (*int) | 1.66e <sup>9</sup> ± 2.93e <sup>8</sup> (*int)        | 9.67e <sup>8</sup> ± 1.91e <sup>8</sup> (*int) | <b>p = 6.8e<sup>-8</sup></b> (Chi <sup>2</sup> = 36.2) |
| Abundance<br>(16S rRNA Gene copies mg <sup>-1</sup> soil C)     | 1.18e <sup>7</sup> ± 1.50e <sup>6</sup> (a)        | 7.96e <sup>6</sup> ± 1.26e <sup>6</sup> (ab)   | 9.20e <sup>6</sup> ± 1.40e <sup>6</sup> (ab)          | 5.91e <sup>6</sup> ± 1.33e <sup>6</sup> (b)    | <b>p = 2.6e<sup>-3</sup></b> (F = 5.3)                 |
| <b>Fungi</b>                                                    |                                                    |                                                |                                                       |                                                |                                                        |
| Richness<br>(No. ASV)                                           | 52 ± 3 (a)                                         | 32 ± 5 (b)                                     | 39 ± 5 (b) [n=12]                                     | 24 ± 3 (b) [n=17]                              | <b>p = 2.5e<sup>-7</sup></b> (F = 14.8)                |
| Diversity<br>(Shannon Index)                                    | 2.43 ± 0.11 (a)                                    | 1.81 ± 0.22 (b)                                | 2.19 ± 0.28 (ab) [n=12]                               | 1.62 ± 0.22 (b) [n=17]                         | <b>p = 1.1e<sup>-3</sup></b> (F = 6.1)                 |
| Abundance<br>(ITS1 Gene Region Copies g <sup>-1</sup> DW)       | 1.56e <sup>8</sup> ± 2.41e <sup>7</sup> (*int)     | 2.36e <sup>6</sup> ± 8.67e <sup>5</sup> (*int) | 1.03e <sup>7</sup> ± 4.18e <sup>6</sup> (*int) [n=13] | 2.46e <sup>6</sup> ± 1.11e <sup>6</sup> (*int) | <b>p = 3.9e<sup>-9</sup></b> (Chi <sup>2</sup> = 42.1) |
| Abundance<br>(ITS1 Gene Region Copies mg soil C <sup>-1</sup> ) | 3.20e <sup>5</sup> ± 6.82e <sup>4</sup> (a) [n=34] | 4.04e <sup>4</sup> ± 1.50e <sup>4</sup> (*int) | 5.15e <sup>4</sup> ± 2.05e <sup>4</sup> (*int) [n=13] | 1.33e <sup>4</sup> ± 5.61e <sup>3</sup> (b)    | <b>p = 4.0e<sup>-7</sup></b> (Chi <sup>2</sup> = 32.6) |

Presented are means ± standard error ( $n_{\text{organic}}=35$ ;  $n_{\text{mineral}}=14$ ;  $n_{\text{cryoturbated}}=13$ ,  $n_{\text{permafrost}}=19$ ; individual deviations noted in the table). Statistical results from linear mixed-effects models (Type II ANOVA  $p$ -values and  $F$ -statistics) are shown in the right column. When model assumptions were not met, Kruskal Wallis tests were used ( $p$ -values and  $\text{Chi}^2$  statistics). Pairwise comparisons (Tukey-adjusted emmeans or Bonferroni-adjusted pairwise Wilcoxon tests) are indicated by letter groupings in brackets. Significant interactions between polygon type and soil layer are marked with (\*int).



**Interactive effects:**

**Bacterial and archaeal abundance (16S rRNA gene copies g<sup>-1</sup> DW)** varied significantly among soil layers in all polygon types (Kruskal Wallis test: LCP  $p = 0.015$ ,  $\chi^2 = 8.42$ ; FCP  $p = 1.4 \times 10^{-3}$ ,  $\chi^2 = 15.59$ ; HCP  $p = 3.9 \times 10^{-5}$ ,  $\chi^2 = 23.07$ ). In each polygon type, the organic layer harbored higher bacterial and archaeal abundances than the permafrost layer (pairwise Wilcoxon tests: LCP  $p = 0.039$ ; FCP  $p = 0.060$ ; HCP  $p = 6.5 \times 10^{-3}$ ). In FCPs and HCPs, the organic layer additionally showed significantly higher abundances than the mineral layer (organic vs. mineral: FCP  $p = 0.026$ ; HCP  $p = 6.5 \times 10^{-3}$ ).

**Fungal abundance (ITS1 gene region copies g<sup>-1</sup> DW)** differed significantly among soil layers across all polygon types (Kruskal Wallis test: LCP  $p = 0.017$ ,  $\chi^2 = 8.21$ ; FCP  $p = 2.54 \times 10^{-4}$ ,  $\chi^2 = 19.15$ ; HCP  $p = 6.88 \times 10^{-5}$ ,  $\chi^2 = 21.89$ ). In each polygon type, the organic layer harbored higher fungal abundance than the permafrost layer (pairwise Wilcoxon tests: LCP  $p = 0.039$ ; FCP  $p = 9.2 \times 10^{-3}$ ; HCP  $p = 6.5 \times 10^{-3}$ ). In FCPs and HCPs, fungal abundance in the organic layer was also higher than in both the mineral and cryoturbated layers (organic vs. mineral: FCP  $p = 0.005$ ; HCP  $p = 6.5 \times 10^{-3}$ ; organic vs. cryoturbated: FCP  $p = 0.009$ ; HCP  $p = 0.013$ ).

**Fungal abundance normalized to soil carbon content (ITS1 gene copies mg<sup>-1</sup> soil C)** varied significantly among soil layers within all polygon types (Kruskal Wallis test: LCP  $p = 0.026$ ,  $\chi^2 = 7.30$ ; FCP  $p = 9.4 \times 10^{-4}$ ,  $\chi^2 = 16.47$ ; HCP  $p = 8.8 \times 10^{-5}$ ,  $\chi^2 = 21.4$ ). In every polygon type, the organic layer showed higher fungal abundance per soil C than the permafrost layer (pairwise Wilcoxon tests: LCP  $p = 0.039$ ; FCP  $p = 0.021$ ; HCP  $p = 0.008$ ). In FCPs and HCPs, fungal abundance in the organic layer also exceeded that in both the mineral and cryoturbated layers (organic vs. mineral: FCP  $p = 0.026$ , HCP  $p = 0.017$ ; organic vs. cryoturbated: FCP  $p = 0.012$ , HCP  $p = 0.034$ ). In HCPs, the permafrost layer had the lowest fungal abundance per soil C of all layers, with significantly lower values compared to both mineral ( $p = 0.030$ ) and cryoturbated layers ( $p = 0.049$ ).

168 **Supplementary Table 7.:** Interactive effects of polygon type and soil layer category on bacterial and  
 169 archaeal community composition (corresponding to Fig. 3. in main text) P-values adjusted after  
 170 Bonferroni; only significant results shown.

| Comparison                                             | Result          | Test            |
|--------------------------------------------------------|-----------------|-----------------|
| <b>organic layer<br/>across all polygon types</b>      | p=0.001, F=4.33 | Permanova       |
| LCP vs. FCP                                            | p=0.003, F=5.29 | Pairwise adonis |
| LCP vs. HCP                                            | p=0.003, F=7.16 |                 |
| <b>mineral layer<br/>across all polygon types</b>      | p=0.067, F=1.64 | Permanova       |
| <b>cryoturbated layer<br/>across all polygon types</b> | p=0.114, F=1.54 | Permanova       |
| <b>permafrost layer<br/>across all polygon types</b>   | p=0.008, F=1.57 | Permanova       |
| LCP vs. FCP                                            | p=0.003, F=2.09 | Pairwise adonis |
| <b>soil layers within LCPs</b>                         | p=0.003, F=2.24 | Permanova       |
| organic vs. permafrost                                 | p=0.006, F=3.37 | Pairwise adonis |
| <b>soil layers within FCPs</b>                         | p=0.001, F=2.65 | Permanova       |
| organic vs. cryoturbated                               | p=0.006, F=2.80 | Pairwise adonis |
| organic vs. permafrost                                 | p=0.006, F=4.59 |                 |
| <b>soil layers within HCPs</b>                         | p=0.001, F=3.80 | Permanova       |
| organic vs. mineral                                    | p=0.006, F=3.94 | Pairwise adonis |
| organic vs. cryoturbated                               | p=0.006, F=4.06 |                 |
| organic vs. permafrost                                 | p=0.006, F=5.71 |                 |
| mineral vs. permafrost                                 | p=0.024, F=3.13 |                 |
| cryoturbated vs. permafrost                            | p=0.018, F=2.66 |                 |

171 **Supplementary Table 8.:** Abundances (ddPCR-corrected reads g<sup>-1</sup> DW soil) of selected bacterial and archaeal phyla in examined soil layers per polygon type.

|                  | Soil Layer   | LCP                                       | FCP                                       | HCP                                       | Polygon effect                                                                                                            | Soil layer effect                                                                                                                                                   | Interactive effect                                                                        |
|------------------|--------------|-------------------------------------------|-------------------------------------------|-------------------------------------------|---------------------------------------------------------------------------------------------------------------------------|---------------------------------------------------------------------------------------------------------------------------------------------------------------------|-------------------------------------------------------------------------------------------|
| Acidobacteriota  | organic      | 2.54 e <sup>8</sup> ± 1.07 e <sup>8</sup> | 7.27 e <sup>8</sup> ± 1.34 e <sup>8</sup> | 7.64 e <sup>8</sup> ± 1.37 e <sup>8</sup> |                                                                                                                           | Kruskal Wallis: p=4.1 e <sup>-9</sup><br><br>Pairwise Wilcox:<br>org-min: p=7.4 e <sup>-5</sup><br>org-cryo: p=4.1 e <sup>-3</sup><br>org-perm: 1.1 e <sup>-6</sup> | Pairwise Wilcox<br>organic:<br><br>LCP-FCP: p=0.036<br>LCP-HCP: p=0.009<br>FCP-HCP: p=1.0 |
|                  | mineral      | 9.36 e <sup>6</sup> ± 4.87 e <sup>6</sup> | 4.11 e <sup>7</sup> ± 9.96 e <sup>6</sup> | 4.69 e <sup>7</sup> ± 1.60 e <sup>7</sup> |                                                                                                                           |                                                                                                                                                                     |                                                                                           |
|                  | cryoturbated | -                                         | 5.74 e <sup>7</sup> ± 2.82 e <sup>7</sup> | 1.07 e <sup>8</sup> ± 4.04 e <sup>7</sup> |                                                                                                                           |                                                                                                                                                                     |                                                                                           |
|                  | permafrost   | 6.53 e <sup>6</sup> ± 3.09 e <sup>6</sup> | 4.42 e <sup>7</sup> ± 2.09 e <sup>7</sup> | 2.02 e <sup>7</sup> ± 1.11 e <sup>7</sup> |                                                                                                                           |                                                                                                                                                                     |                                                                                           |
| Actinobacteriota | organic      | 7.62 e <sup>7</sup> ± 2.43 e <sup>7</sup> | 1.44 e <sup>8</sup> ± 3.31 e <sup>7</sup> | 1.29 e <sup>8</sup> ± 2.10 e <sup>7</sup> | LME: p=0.004<br><br>Emmeans pairwise:<br>LCP-FCP: p=0.023<br>LCP-HCP: p=0.013<br>FCP-HCP: p=0.935                         | LME: p=3.7 e <sup>-6</sup><br><br>Emmeans pairwise:<br>org-min: p=0.023<br>org-cryo: p=0.961<br>org-perm: p=0.030                                                   |                                                                                           |
|                  | mineral      | 1.57 e <sup>7</sup> ± 7.14 e <sup>6</sup> | 2.18 e <sup>7</sup> ± 9.05 e <sup>6</sup> | 3.16 e <sup>7</sup> ± 7.95 e <sup>6</sup> |                                                                                                                           |                                                                                                                                                                     |                                                                                           |
|                  | cryoturbated | -                                         | 1.02 e <sup>8</sup> ± 1.65 e <sup>7</sup> | 1.76 e <sup>8</sup> ± 2.39 e <sup>7</sup> |                                                                                                                           |                                                                                                                                                                     |                                                                                           |
|                  | permafrost   | 2.06 e <sup>7</sup> ± 8.05 e <sup>6</sup> | 1.15 e <sup>8</sup> ± 4.32 e <sup>7</sup> | 6.45 e <sup>7</sup> ± 2.77 e <sup>7</sup> |                                                                                                                           |                                                                                                                                                                     |                                                                                           |
| Armatimonadota   | organic      | 2.86 e <sup>5</sup> ± 1.80 e <sup>5</sup> | 3.19 e <sup>6</sup> ± 1.04 e <sup>6</sup> | 5.12 e <sup>6</sup> ± 1.97 e <sup>6</sup> | Kruskal Wallis: p=9.5 e <sup>-3</sup><br><br>Pairwise Wilcox:<br>LCP-FCP: p=0.008<br>LCP-HCP: p=0.097<br>FCP-HCP: p=0.990 |                                                                                                                                                                     |                                                                                           |
|                  | mineral      | 3.07 e <sup>5</sup> ± 3.07 e <sup>5</sup> | 1.37 e <sup>6</sup> ± 4.41 e <sup>5</sup> | 3.76 e <sup>5</sup> ± 9.97 e <sup>4</sup> |                                                                                                                           |                                                                                                                                                                     |                                                                                           |
|                  | cryoturbated | -                                         | 1.63 e <sup>6</sup> ± 1.01 e <sup>6</sup> | 4.99 e <sup>5</sup> ± 2.34 e <sup>5</sup> |                                                                                                                           |                                                                                                                                                                     |                                                                                           |
|                  | permafrost   | 4.65 e <sup>5</sup> ± 2.47 e <sup>5</sup> | 2.97e <sup>6</sup> ± 1.59 e <sup>6</sup>  | 7.53 e <sup>5</sup> ± 4.86 e <sup>5</sup> |                                                                                                                           |                                                                                                                                                                     |                                                                                           |
| Bacteroidota     | organic      | 5.83 e <sup>8</sup> ± 1.31 e <sup>8</sup> | 1.06 e <sup>9</sup> ± 2.36 e <sup>8</sup> | 1.02 e <sup>9</sup> ± 1.89 e <sup>8</sup> |                                                                                                                           | Kruskal-Wallis: p=1.6 e <sup>-6</sup><br><br>Pairwise Wilcox:<br>org-min: p=4.0 e <sup>-5</sup><br>org-cryo: p=0.429<br>org-perm: 0.008                             |                                                                                           |
|                  | mineral      | 7.06 e <sup>7</sup> ± 4.17 e <sup>7</sup> | 1.09 e <sup>8</sup> ± 4.93 e <sup>7</sup> | 1.15 e <sup>8</sup> ± 4.54 e <sup>7</sup> |                                                                                                                           |                                                                                                                                                                     |                                                                                           |
|                  | cryoturbated | -                                         | 6.94 e <sup>8</sup> ± 2.20 e <sup>8</sup> | 3.36 e <sup>8</sup> ± 5.58 e <sup>7</sup> |                                                                                                                           |                                                                                                                                                                     |                                                                                           |
|                  | permafrost   | 1.21 e <sup>8</sup> ± 2.25 e <sup>7</sup> | 6.26 e <sup>8</sup> ± 1.46 e <sup>8</sup> | 2.68 e <sup>8</sup> ± 7.56 e <sup>7</sup> |                                                                                                                           |                                                                                                                                                                     |                                                                                           |
| Bdellovibrionota | organic      | 1.83 e <sup>6</sup> ± 1.13 e <sup>6</sup> | 5.44 e <sup>6</sup> ± 1.48 e <sup>6</sup> | 4.79 e <sup>6</sup> ± 2.05 e <sup>6</sup> | Kruskal Wallis: p=5.7 e <sup>-4</sup><br><br>Pairwise Wilcox:<br>LCP-FCP: p=3.9 e <sup>-4</sup>                           |                                                                                                                                                                     |                                                                                           |
|                  | mineral      | 2.01 e <sup>5</sup> ± 4.39 e <sup>4</sup> | 1.51 e <sup>6</sup> ± 1.16 e <sup>6</sup> | 1.61 e <sup>6</sup> ± 6.75 e <sup>5</sup> |                                                                                                                           |                                                                                                                                                                     |                                                                                           |
|                  | cryoturbated | -                                         | 8.90 e <sup>6</sup> ± 2.78 e <sup>6</sup> | 7.45 e <sup>6</sup> ± 2.19 e <sup>6</sup> |                                                                                                                           |                                                                                                                                                                     |                                                                                           |

|                  |              |                                           |                                           |                                           |                                                                                            |                                                                                  |                                                                                                          |
|------------------|--------------|-------------------------------------------|-------------------------------------------|-------------------------------------------|--------------------------------------------------------------------------------------------|----------------------------------------------------------------------------------|----------------------------------------------------------------------------------------------------------|
|                  | permafrost   | 2.75 e <sup>4</sup> ± 2.75 e <sup>4</sup> | 3.22 e <sup>6</sup> ± 8.21 e <sup>5</sup> | 1.15 e <sup>6</sup> ± 8.83 e <sup>5</sup> | LCP-HCP: p=0.016<br>FCP-HCP: p=0.904                                                       |                                                                                  |                                                                                                          |
| Caldisericota    | organic      | 3.69 e <sup>5</sup> ± 2.45 e <sup>5</sup> | 0.00 ± 0.00                               | 0.00 ± 0.00                               |                                                                                            | The permafrost layer harbored 81 % of ddPCR-corr. reads assigned to this phylum. |                                                                                                          |
|                  | mineral      | 8.93 e <sup>5</sup> ± 2.10 e <sup>5</sup> | 2.58 e <sup>5</sup> ± 2.58 e <sup>5</sup> | 0.00 ± 0.00                               |                                                                                            |                                                                                  |                                                                                                          |
|                  | cryoturbated | -                                         | 3.69 e <sup>5</sup> ± 2.26 e <sup>5</sup> | 0.00 ± 0.00                               |                                                                                            |                                                                                  |                                                                                                          |
|                  | permafrost   | 1.25 e <sup>6</sup> ± 4.43 e <sup>5</sup> | 1.85 e <sup>6</sup> ± 1.04 e <sup>6</sup> | 3.37 e <sup>6</sup> ± 1.91 e <sup>6</sup> |                                                                                            |                                                                                  |                                                                                                          |
| Campylobacterota | organic      | 0.00 ± 0.00                               | 0.00 ± 0.00                               | 0.00 ± 0.00                               |                                                                                            | The permafrost layer harbored 93 % of ddPCR-corr. reads assigned to this phylum. |                                                                                                          |
|                  | mineral      | 0.00 ± 0.00                               | 0.00 ± 0.00                               | 0.00 ± 0.00                               |                                                                                            |                                                                                  |                                                                                                          |
|                  | cryoturbated | -                                         | 2.48 e <sup>5</sup> ± 2.48 e <sup>5</sup> | 0.00 ± 0.00                               |                                                                                            |                                                                                  |                                                                                                          |
|                  | permafrost   | 3.83 e <sup>5</sup> ± 2.86 e <sup>5</sup> | 9.41 e <sup>5</sup> ± 4.78 e <sup>5</sup> | 1.20 e <sup>6</sup> ± 1.11 e <sup>6</sup> |                                                                                            |                                                                                  |                                                                                                          |
| Cloacimonadota   | organic      | 5.06 e <sup>5</sup> ± 3.29 e <sup>5</sup> | 0.00 ± 0.00                               | 0.00 ± 0.00                               |                                                                                            | The permafrost layer harbored 68 % of ddPCR-corr. reads assigned to this phylum. |                                                                                                          |
|                  | mineral      | 0.00 ± 0.00                               | 3.02 e <sup>4</sup> ± 3.02 e <sup>4</sup> | 0.00 ± 0.00                               |                                                                                            |                                                                                  |                                                                                                          |
|                  | cryoturbated | -                                         | 0.00 ± 0.00                               | 0.00 ± 0.00                               |                                                                                            |                                                                                  |                                                                                                          |
|                  | permafrost   | 9.01 e <sup>5</sup> ± 7.55 e <sup>5</sup> | 9.28 e <sup>5</sup> ± 7.28 e <sup>5</sup> | 2.08 e <sup>5</sup> ± 1.25 e <sup>5</sup> |                                                                                            |                                                                                  |                                                                                                          |
| Cyanobacteria    | organic      | 6.00 e <sup>5</sup> ± 3.68 e <sup>5</sup> | 1.73 e <sup>6</sup> ± 1.03 e <sup>6</sup> | 4.98 e <sup>6</sup> ± 1.70 e <sup>6</sup> | LME: p=5.2 e                                                                               |                                                                                  |                                                                                                          |
|                  | mineral      | 1.54 e <sup>5</sup> ± 9.11 e <sup>4</sup> | 2.46 e <sup>5</sup> ± 1.79 e <sup>5</sup> | 7.25 e <sup>5</sup> ± 3.85 e <sup>5</sup> | Emmeans pairwise:<br>LCP-FCP: p=0.318<br>LCP-HCP: p=0.013<br>FCP-HCP: p=0.120              |                                                                                  |                                                                                                          |
|                  | cryoturbated | -                                         | 1.01 e <sup>6</sup> ± 5.02 e <sup>5</sup> | 3.06 e <sup>6</sup> ± 1.40 e <sup>6</sup> |                                                                                            |                                                                                  |                                                                                                          |
|                  | permafrost   | 0.00 ± 0.00                               | 1.81 e <sup>5</sup> ± 1.81 e <sup>5</sup> | 0.00 ± 0.00                               |                                                                                            |                                                                                  |                                                                                                          |
| Crenarchaeota    | organic      | 9.69 e <sup>6</sup> ± 3.64 e <sup>6</sup> | 2.60 e <sup>6</sup> ± 2.04 e <sup>6</sup> | 0.00 ± 0.00                               | Kruskal Wallis: p=2.3 e <sup>-5</sup>                                                      |                                                                                  | Pairwise Wilcox - organic:<br><br>LCP-FCP: p=0.049<br>LCP-HCP: p=6.4 e <sup>-4</sup><br>FCP-HCP: p=0.278 |
|                  | mineral      | 2.63 e <sup>4</sup> ± 2.63 e <sup>4</sup> | 3.36 e <sup>5</sup> ± 2.00 e <sup>5</sup> | 6.23 e <sup>4</sup> ± 6.23 e <sup>4</sup> | Pairwise Wilcox:<br>LCP-FCP: p=0.014<br>LCP-HCP: p=2.4 e <sup>-5</sup><br>FCP-HCP: p=0.131 |                                                                                  |                                                                                                          |
|                  | cryoturbated | -                                         | 9.07 e <sup>4</sup> ± 9.07 e <sup>4</sup> | 0.00 ± 0.00                               |                                                                                            |                                                                                  |                                                                                                          |
|                  | permafrost   | 2.57 e <sup>5</sup> ± 1.45 e <sup>5</sup> | 9.62 e <sup>4</sup> ± 6.21 e <sup>4</sup> | 6.33 e <sup>4</sup> ± 4.06 e <sup>4</sup> |                                                                                            |                                                                                  |                                                                                                          |
|                  | organic      | 2.04 e <sup>8</sup> ± 5.97 e <sup>7</sup> | 7.89 e <sup>7</sup> ± 3.32 e <sup>7</sup> | 3.27 e <sup>7</sup> ± 1.25 e <sup>7</sup> |                                                                                            |                                                                                  |                                                                                                          |

|                  |              |                                         |                                         |                                         |                                       |                                       |                                |
|------------------|--------------|-----------------------------------------|-----------------------------------------|-----------------------------------------|---------------------------------------|---------------------------------------|--------------------------------|
| Desulfobacterota | mineral      | $1.66 \text{ e}^7 \pm 8.41 \text{ e}^6$ | $4.26 \text{ e}^7 \pm 2.04 \text{ e}^7$ | $1.27 \text{ e}^7 \pm 2.44 \text{ e}^6$ |                                       |                                       | Pairwise Wilcoxon - organic:   |
|                  | cryoturbated | -                                       | $8.31 \text{ e}^7 \pm 2.23 \text{ e}^7$ | $2.31 \text{ e}^7 \pm 7.15 \text{ e}^6$ |                                       |                                       | LCP-FCP: p=0.207               |
|                  | permafrost   | $1.41 \text{ e}^7 \pm 3.55 \text{ e}^6$ | $6.10 \text{ e}^7 \pm 1.16 \text{ e}^7$ | $2.05 \text{ e}^7 \pm 4.44 \text{ e}^6$ |                                       |                                       | LCP- HCP: p=0.018              |
|                  |              |                                         |                                         |                                         |                                       |                                       | FCP-HCP: p=1.0                 |
| Euryarchaeota    | organic      | $8.11 \text{ e}^7 \pm 3.29 \text{ e}^7$ | $9.61 \text{ e}^6 \pm 6.85 \text{ e}^6$ | $3.00 \text{ e}^5 \pm 3.00 \text{ e}^5$ | Kruskal Wallis: p=1.4 e <sup>-4</sup> |                                       | Pairwise Wilcoxon organic:     |
|                  | mineral      | $3.52 \text{ e}^5 \pm 1.59 \text{ e}^4$ | $5.00 \text{ e}^5 \pm 2.66 \text{ e}^5$ | $1.17 \text{ e}^6 \pm 5.67 \text{ e}^5$ | Pairwise Wilcoxon:                    |                                       | LCP-FCP: p=0.006               |
|                  | cryoturbated | -                                       | $1.11 \text{ e}^6 \pm 5.09 \text{ e}^5$ | $1.29 \text{ e}^6 \pm 8.22 \text{ e}^5$ | LCP-FCP: p=0.005                      |                                       | LCP-HCP: p=2.3 e <sup>-4</sup> |
|                  | permafrost   | $1.34 \text{ e}^6 \pm 4.72 \text{ e}^5$ | $3.29 \text{ e}^6 \pm 1.46 \text{ e}^6$ | $1.67 \text{ e}^6 \pm 1.27 \text{ e}^6$ | LCP-HCP: p=1.9 e <sup>-4</sup>        |                                       | FCP-HCP: p=0.853               |
|                  |              |                                         |                                         |                                         | FCP-HCP: p=0.972                      |                                       |                                |
| Firmicutes       | organic      | $1.24 \text{ e}^7 \pm 2.45 \text{ e}^6$ | $6.97 \text{ e}^6 \pm 2.34 \text{ e}^6$ | $5.53 \text{ e}^6 \pm 1.43 \text{ e}^6$ |                                       | Kruskal Wallis: p=5.1 e <sup>-5</sup> |                                |
|                  | mineral      | $4.91 \text{ e}^6 \pm 3.30 \text{ e}^6$ | $5.40 \text{ e}^6 \pm 2.42 \text{ e}^6$ | $1.70 \text{ e}^6 \pm 8.04 \text{ e}^5$ |                                       | Pairwise Wilcoxon:                    |                                |
|                  | cryoturbated | -                                       | $1.67 \text{ e}^7 \pm 7.69 \text{ e}^6$ | $5.08 \text{ e}^6 \pm 1.40 \text{ e}^6$ |                                       | perm-org: p=9.0 e <sup>-4</sup>       |                                |
|                  | permafrost   | $2.30 \text{ e}^7 \pm 5.37 \text{ e}^6$ | $3.69 \text{ e}^7 \pm 1.25 \text{ e}^7$ | $2.34 \text{ e}^7 \pm 6.21 \text{ e}^6$ |                                       | perm-min: p=3.4 e <sup>-4</sup>       |                                |
|                  |              |                                         |                                         |                                         |                                       | perm-cryo: p=0.067                    |                                |
| Gemmatimonadota  | organic      | $4.74 \text{ e}^4 \pm 4.74 \text{ e}^4$ | $1.23 \text{ e}^7 \pm 3.55 \text{ e}^6$ | $2.96 \text{ e}^7 \pm 6.59 \text{ e}^6$ | Kruskal Wallis: p=3.0 e <sup>-8</sup> |                                       | Pairwise Wilcoxon permafrost:  |
|                  | mineral      | $4.73 \text{ e}^4 \pm 4.73 \text{ e}^4$ | $3.96 \text{ e}^6 \pm 1.14 \text{ e}^6$ | $8.22 \text{ e}^6 \pm 3.78 \text{ e}^6$ | Pairwise Wilcoxon:                    |                                       | LCP-FCP: p=0.02                |
|                  | cryoturbated | -                                       | $3.41 \text{ e}^7 \pm 2.3 \text{ e}^7$  | $1.93 \text{ e}^7 \pm 4.71 \text{ e}^6$ | LCP-FCP: p=1.4 e <sup>-7</sup>        |                                       | LCP-HCP: p=0.22                |
|                  | permafrost   | $0.00 \pm 0.00$                         | $1.39 \text{ e}^7 \pm 9.38 \text{ e}^6$ | $1.63 \text{ e}^6 \pm 9.88 \text{ e}^5$ | LCP-HCP: p=5.5 e <sup>-7</sup>        |                                       | FCP-HCP: p=0.25                |
|                  |              |                                         |                                         |                                         | FCP-HCP: p=1.0                        |                                       |                                |
| Halobacterota    | organic      | $1.36 \text{ e}^7 \pm 2.57 \text{ e}^6$ | $9.75 \text{ e}^5 \pm 7.23 \text{ e}^5$ | $1.42 \text{ e}^5 \pm 1.42 \text{ e}^5$ | Kruskal Wallis: p=3.6 e <sup>-5</sup> |                                       | Pairwise Wilcoxon organic:     |
|                  | mineral      | $4.00 \text{ e}^6 \pm 1.52 \text{ e}^6$ | $1.89 \text{ e}^6 \pm 1.51 \text{ e}^6$ | $1.84 \text{ e}^6 \pm 1.42 \text{ e}^6$ | Pairwise Wilcoxon:                    |                                       | LCP-FCP: p=1.6 e <sup>-4</sup> |
|                  | cryoturbated | -                                       | $5.29 \text{ e}^6 \pm 2.72 \text{ e}^6$ | $4.40 \text{ e}^6 \pm 1.18 \text{ e}^6$ | LCP-FCP: p=2.1 e <sup>-4</sup>        |                                       | LCP-HCP: p=1.0 e <sup>-4</sup> |
|                  | permafrost   | $4.22 \text{ e}^6 \pm 1.86 \text{ e}^6$ | $4.03 \text{ e}^6 \pm 1.80 \text{ e}^6$ | $5.09 \text{ e}^6 \pm 1.37 \text{ e}^6$ | LCP-HCP: p=2.0 e <sup>-4</sup>        |                                       | FCP-HCP: p=1.0                 |
|                  |              |                                         |                                         |                                         | FCP-HCP: p=1.0                        |                                       |                                |
| Latescibacterota | organic      | $8.54 \text{ e}^6 \pm 3.95 \text{ e}^6$ | $0.00 \pm 0.00$                         | $1.22 \text{ e}^6 \pm 9.36 \text{ e}^5$ |                                       |                                       | LCP organic                    |
|                  | mineral      | $3.07 \text{ e}^5 \pm 3.07 \text{ e}^5$ | $5.50 \text{ e}^4 \pm 3.81 \text{ e}^4$ | $0.00 \pm 0.00$                         |                                       |                                       | harbored 88 % of               |
|                  | cryoturbated | -                                       | $0.00 \pm 0.00$                         | $0.00 \pm 0.00$                         |                                       |                                       | ddPCR-corr. reads              |

|                  |              |                                         |                                         |                                         |  |                                                                                   |                                                                                            |
|------------------|--------------|-----------------------------------------|-----------------------------------------|-----------------------------------------|--|-----------------------------------------------------------------------------------|--------------------------------------------------------------------------------------------|
|                  | permafrost   | $1.10 \text{ e}^4 \pm 1.10 \text{ e}^4$ | $0.00 \pm 0.00$                         | $0.00 \pm 0.00$                         |  |                                                                                   | assigned to this phylum                                                                    |
| Methyloirabilota | organic      | $4.04 \text{ e}^6 \pm 8.17 \text{ e}^5$ | $2.12 \text{ e}^6 \pm 1.71 \text{ e}^6$ | $3.24 \text{ e}^5 \pm 3.24 \text{ e}^5$ |  | The permafrost layer harbored < 1 % of ddPCR-corr. reads assigned to this phylum. | LCP organic harbored 60 % of ddPCR-corr. reads assigned to this phylum                     |
|                  | mineral      | $2.10 \text{ e}^5 \pm 1.58 \text{ e}^5$ | $2.13 \text{ e}^5 \pm 1.54 \text{ e}^5$ | $1.24 \text{ e}^5 \pm 8.18 \text{ e}^4$ |  |                                                                                   |                                                                                            |
|                  | cryoturbated | -                                       | $0.00 \pm 0.00$                         | $0.00 \pm 0.00$                         |  |                                                                                   |                                                                                            |
|                  | permafrost   | $1.18 \text{ e}^5 \pm 7.52 \text{ e}^4$ | $0.00 \pm 0.00$                         | $0.00 \pm 0.00$                         |  |                                                                                   |                                                                                            |
| Micrarchaeota    | organic      | $2.57 \text{ e}^6 \pm 9.44 \text{ e}^5$ | $1.17 \text{ e}^6 \pm 1.17 \text{ e}^6$ | $0.00 \pm 0.00$                         |  |                                                                                   | LCP organic harbored 69 % of ddPCR-corr. reads assigned to this phylum                     |
|                  | mineral      | $0.00 \pm 0.00$                         | $0.00 \pm 0.00$                         | $0.00 \pm 0.00$                         |  |                                                                                   |                                                                                            |
|                  | cryoturbated | -                                       | $0.00 \pm 0.00$                         | $0.00 \pm 0.00$                         |  |                                                                                   |                                                                                            |
|                  | permafrost   | $0.00 \pm 0.00$                         | $0.00 \pm 0.00$                         | $0.00 \pm 0.00$                         |  |                                                                                   |                                                                                            |
| Myxococcota      | organic      | $9.63 \text{ e}^6 \pm 6.20 \text{ e}^6$ | $2.71 \text{ e}^7 \pm 7.93 \text{ e}^6$ | $3.59 \text{ e}^7 \pm 5.74 \text{ e}^6$ |  |                                                                                   | Pairwise Wilcoxon organic:<br><br>LCP-FCP: p=0.104<br>LCP-HCP: p=0.007<br>FCP-HCP: p=0.765 |
|                  | mineral      | $1.91 \text{ e}^5 \pm 5.44 \text{ e}^4$ | $1.25 \text{ e}^5 \pm 1.11 \text{ e}^5$ | $1.58 \text{ e}^6 \pm 6.00 \text{ e}^5$ |  |                                                                                   |                                                                                            |
|                  | cryoturbated | -                                       | $1.68 \text{ e}^6 \pm 8.45 \text{ e}^5$ | $2.83 \text{ e}^6 \pm 7.48 \text{ e}^5$ |  |                                                                                   |                                                                                            |
|                  | permafrost   | $0.00 \pm 0.00$                         | $6.73 \text{ e}^5 \pm 6.73 \text{ e}^5$ | $0.00 \pm 0.00$                         |  |                                                                                   |                                                                                            |
| Nanoarchaeota    | organic      | $4.56 \text{ e}^7 \pm 1.47 \text{ e}^7$ | $3.03 \text{ e}^7 \pm 1.34 \text{ e}^7$ | $6.63 \text{ e}^5 \pm 4.58 \text{ e}^5$ |  |                                                                                   | LCP organic harbored 48 % of ddPCR-corr. reads assigned to this phylum.                    |
|                  | mineral      | $1.93 \text{ e}^6 \pm 1.87 \text{ e}^6$ | $1.83 \text{ e}^6 \pm 1.09 \text{ e}^6$ | $5.80 \text{ e}^5 \pm 3.89 \text{ e}^5$ |  |                                                                                   |                                                                                            |
|                  | cryoturbated | -                                       | $1.87 \text{ e}^7 \pm 8.03 \text{ e}^6$ | $8.24 \text{ e}^5 \pm 6.60 \text{ e}^5$ |  |                                                                                   |                                                                                            |
|                  | permafrost   | $1.85 \text{ e}^6 \pm 7.68 \text{ e}^5$ | $1.26 \text{ e}^7 \pm 8.25 \text{ e}^6$ | $4.87 \text{ e}^5 \pm 2.10 \text{ e}^5$ |  |                                                                                   |                                                                                            |
| Patescibacteria  | organic      | $4.81 \text{ e}^7 \pm 1.00 \text{ e}^7$ | $2.55 \text{ e}^7 \pm 9.85 \text{ e}^6$ | $1.15 \text{ e}^7 \pm 3.84 \text{ e}^6$ |  |                                                                                   | Emmeans pairwise organic:<br><br>LCP-FCP: p=0.211<br>LCP-HCP: p=0.009<br>FCP-HCP: p=0.320  |
|                  | mineral      | $4.46 \text{ e}^6 \pm 6.95 \text{ e}^5$ | $1.52 \text{ e}^7 \pm 8.10 \text{ e}^6$ | $1.71 \text{ e}^7 \pm 1.03 \text{ e}^7$ |  |                                                                                   |                                                                                            |
|                  | cryoturbated | -                                       | $7.14 \text{ e}^7 \pm 2.35 \text{ e}^7$ | $4.54 \text{ e}^7 \pm 1.22 \text{ e}^7$ |  |                                                                                   |                                                                                            |
|                  | permafrost   | $1.17 \text{ e}^7 \pm 5.39 \text{ e}^6$ | $5.00 \text{ e}^7 \pm 1.01 \text{ e}^7$ | $1.52 \text{ e}^7 \pm 3.66 \text{ e}^6$ |  |                                                                                   |                                                                                            |
|                  | organic      | $1.53 \text{ e}^7 \pm 5.40 \text{ e}^6$ | $5.21 \text{ e}^7 \pm 1.69 \text{ e}^7$ | $5.15 \text{ e}^7 \pm 8.91 \text{ e}^6$ |  |                                                                                   |                                                                                            |

|                              |              |                                           |                                           |                                           |                                                                                                            |                                                                                                                                           |                                                                                            |
|------------------------------|--------------|-------------------------------------------|-------------------------------------------|-------------------------------------------|------------------------------------------------------------------------------------------------------------|-------------------------------------------------------------------------------------------------------------------------------------------|--------------------------------------------------------------------------------------------|
| Planctomycetota              | mineral      | 0.00 ± 0.00                               | 1.49 e <sup>6</sup> ± 5.60 e <sup>5</sup> | 2.47 e <sup>6</sup> ± 1.21 e <sup>6</sup> |                                                                                                            |                                                                                                                                           | Pairwise Wilcoxon - organic:<br><br>LCP-FCP: p=0.235<br>LCP-HCP: p=0.005<br>FCP-HCP: p=1.0 |
|                              | cryoturbated | -                                         | 4.92 e <sup>6</sup> ± 2.93 e <sup>6</sup> | 4.63 e <sup>6</sup> ± 1.92 e <sup>6</sup> |                                                                                                            | .                                                                                                                                         |                                                                                            |
|                              | permafrost   | 1.32 e <sup>5</sup> ± 1.07 e <sup>5</sup> | 1.65 e <sup>6</sup> ± 8.07 e <sup>5</sup> | 1.06 e <sup>6</sup> ± 9.46 e <sup>5</sup> |                                                                                                            |                                                                                                                                           |                                                                                            |
| Proteobacteria               | organic      | 2.45 e <sup>8</sup> ± 7.11 e <sup>7</sup> | 7.06 e <sup>8</sup> ± 1.40 e <sup>8</sup> | 8.26 e <sup>8</sup> ± 1.77 e <sup>8</sup> | Kruskal Wallis: p=0.008<br><br>Pairwise Wilcoxon:<br>LCP-FCP: p=0.05<br>LCP-HCP: p=0.008<br>FCP-HCP: p=1.0 | Kruskal Wallis: p=2.9 e <sup>-5</sup><br><br>Pairwise Wilcoxon:<br>org-min: p=1.6 e <sup>-4</sup><br>org-cryo: p=1.0<br>org-perm: p=0.015 |                                                                                            |
|                              | mineral      | 7.07 e <sup>6</sup> ± 2.06 e <sup>5</sup> | 6.16 e <sup>7</sup> ± 2.44 e <sup>7</sup> | 1.42 e <sup>8</sup> ± 3.47 e <sup>7</sup> |                                                                                                            |                                                                                                                                           |                                                                                            |
|                              | cryoturbated | -                                         | 4.89 e <sup>8</sup> ± 3.21 e <sup>8</sup> | 4.29 e <sup>8</sup> ± 9.87 e <sup>7</sup> |                                                                                                            |                                                                                                                                           |                                                                                            |
|                              | permafrost   | 9.90 e <sup>7</sup> ± 4.57 e <sup>7</sup> | 3.27 e <sup>8</sup> ± 9.45 e <sup>7</sup> | 2.18 e <sup>8</sup> ± 9.26 e <sup>7</sup> |                                                                                                            |                                                                                                                                           |                                                                                            |
| RCP2-54                      | organic      | 3.19 e <sup>5</sup> ± 3.19 e <sup>5</sup> | 7.00 e <sup>6</sup> ± 2.40 e <sup>6</sup> | 2.23 e <sup>6</sup> ± 7.31 e <sup>5</sup> | LCPs harbored 2.5 % of ddPCR-corr. reads assigned to this phylum.                                          |                                                                                                                                           |                                                                                            |
|                              | mineral      | 0.00 ± 0.00                               | 7.81 e <sup>5</sup> ± 4.02 e <sup>5</sup> | 2.61 e <sup>6</sup> ± 1.61 e <sup>6</sup> |                                                                                                            |                                                                                                                                           |                                                                                            |
|                              | cryoturbated | -                                         | 8.30 e <sup>5</sup> ± 7.02 e <sup>5</sup> | 2.13 e <sup>6</sup> ± 1.40 e <sup>6</sup> |                                                                                                            |                                                                                                                                           |                                                                                            |
|                              | permafrost   | 0.00 ± 0.00                               | 0.00 ± 0.00                               | 4.32 e <sup>5</sup> ± 3.82 e <sup>5</sup> |                                                                                                            |                                                                                                                                           |                                                                                            |
| Sva0485                      | organic      | 6.91 e <sup>6</sup> ± 2.49 e <sup>6</sup> | 0.00 ± 0.00                               | 0.00 ± 0.00                               |                                                                                                            |                                                                                                                                           | LCP organic harbored 99.6 % of ddPCR-corr. reads assigned to this phylum                   |
|                              | mineral      | 1.84 e <sup>5</sup> ± 1.84 e <sup>5</sup> | 0.00 ± 0.00                               | 0.00 ± 0.00                               |                                                                                                            |                                                                                                                                           |                                                                                            |
|                              | cryoturbated | -                                         | 0.00 ± 0.00                               | 0.00 ± 0.00                               |                                                                                                            |                                                                                                                                           |                                                                                            |
|                              | permafrost   | 0.00 ± 0.00                               | 0.00 ± 0.00                               | 0.00 ± 0.00                               |                                                                                                            |                                                                                                                                           |                                                                                            |
| TA06                         | organic      | 1.81 e <sup>6</sup> ± 5.15 e <sup>5</sup> | 0.00 ± 0.00                               | 0.00 ± 0.00                               |                                                                                                            |                                                                                                                                           | LCP organic harbored 97 % of ddPCR-corr. reads assigned to this phylum                     |
|                              | mineral      | 3.68 e <sup>5</sup> ± 3.68 e <sup>5</sup> | 0.00 ± 0.00                               | 0.00 ± 0.00                               |                                                                                                            |                                                                                                                                           |                                                                                            |
|                              | cryoturbated | -                                         | 0.00 ± 0.00                               | 0.00 ± 0.00                               |                                                                                                            |                                                                                                                                           |                                                                                            |
|                              | permafrost   | 0.00 ± 0.00                               | 0.00 ± 0.00                               | 0.00 ± 0.00                               |                                                                                                            |                                                                                                                                           |                                                                                            |
| Unknown Taxa on Phylum level | organic      | 7.58 e <sup>6</sup> ± 5.74 e <sup>6</sup> | 1.45 e <sup>6</sup> ± 7.18 e <sup>5</sup> | 4.23 e <sup>5</sup> ± 4.23 e <sup>5</sup> |                                                                                                            | The permafrost layer harbored 43 % of ddPCR-corr. reads assigned to this phylum.                                                          |                                                                                            |
|                              | mineral      | 2.55 e <sup>6</sup> ± 1.99 e <sup>6</sup> | 1.89 e <sup>6</sup> ± 1.02 e <sup>6</sup> | 1.09 e <sup>6</sup> ± 4.20 e <sup>5</sup> |                                                                                                            |                                                                                                                                           |                                                                                            |
|                              | cryoturbated | -                                         | 1.18 e <sup>7</sup> ± 3.97 e <sup>6</sup> | 2.03 e <sup>6</sup> ± 7.93 e <sup>5</sup> |                                                                                                            |                                                                                                                                           |                                                                                            |

|                   |              |                                         |                                         |                                         |                                                                                                                    |                                                                                                                                                               |  |
|-------------------|--------------|-----------------------------------------|-----------------------------------------|-----------------------------------------|--------------------------------------------------------------------------------------------------------------------|---------------------------------------------------------------------------------------------------------------------------------------------------------------|--|
|                   | permafrost   | $4.17 \text{ e}^6 \pm 1.40 \text{ e}^6$ | $1.46 \text{ e}^7 \pm 5.94 \text{ e}^6$ | $4.90 \text{ e}^6 \pm 2.12 \text{ e}^6$ |                                                                                                                    |                                                                                                                                                               |  |
| Verrucomicrobiota | organic      | $1.61 \text{ e}^8 \pm 4.78 \text{ e}^7$ | $8.19 \text{ e}^8 \pm 1.35 \text{ e}^8$ | $8.99 \text{ e}^8 \pm 1.15 \text{ e}^8$ | Kruskal Wallis: $p=0.0150$<br><br>Pairwise Wilcox:<br>LCP-FCP: $p=0.035$<br>LCP-HCP: $p=0.027$<br>FCP-HCP: $p=1.0$ | Kruskal Wallis: $p=1.08 \text{ e}^{-8}$<br><br>Pairwise Wilcox:<br>org-min: $p=9.1 \text{ e}^{-5}$<br>org-cryo: $p=0.087$<br>org-perm: $p=3.1 \text{ e}^{-6}$ |  |
|                   | mineral      | $2.94 \text{ e}^7 \pm 5.19 \text{ e}^6$ | $4.11 \text{ e}^7 \pm 1.07 \text{ e}^7$ | $7.80 \text{ e}^7 \pm 2.48 \text{ e}^7$ |                                                                                                                    |                                                                                                                                                               |  |
|                   | cryoturbated | -                                       | $2.35 \text{ e}^8 \pm 1.54 \text{ e}^8$ | $1.91 \text{ e}^8 \pm 3.53 \text{ e}^7$ |                                                                                                                    |                                                                                                                                                               |  |
|                   | permafrost   | $1.14 \text{ e}^7 \pm 5.77 \text{ e}^6$ | $1.04 \text{ e}^8 \pm 4.74 \text{ e}^7$ | $2.45 \text{ e}^7 \pm 1.10 \text{ e}^7$ |                                                                                                                    |                                                                                                                                                               |  |
| WPS-2             | organic      | $5.56 \text{ e}^5 \pm 4.10 \text{ e}^5$ | $3.67 \text{ e}^6 \pm 1.80 \text{ e}^6$ | $4.04 \text{ e}^6 \pm 2.36 \text{ e}^6$ | LCPs harbored 6.4 % of<br>ddPCR-corr. reads<br>assigned to this phylum.                                            |                                                                                                                                                               |  |
|                   | mineral      | $0.00 \pm 0.00$                         | $4.11 \text{ e}^5 \pm 2.52 \text{ e}^5$ | $0.00 \pm 0.00$                         |                                                                                                                    |                                                                                                                                                               |  |
|                   | cryoturbated | -                                       | $5.41 \text{ e}^5 \pm 5.41 \text{ e}^5$ | $5.84 \text{ e}^5 \pm 3.89 \text{ e}^5$ |                                                                                                                    |                                                                                                                                                               |  |
|                   | permafrost   | $0.00 \pm 0.00$                         | $0.00 \pm 0.00$                         | $0.00 \pm 0.00$                         |                                                                                                                    |                                                                                                                                                               |  |

*Presented are means  $\pm$  standard error (LCP\_organic:  $n=12$ , FCP\_organic:  $n=12$ , HCP\_organic:  $n=11$ , LCP\_mineral:  $n=2$ , FCP\_mineral:  $n=6$ , HCP\_mineral:  $n=6$ , FCP\_cryoturbated:  $n=5$ , HCP\_cryoturbated:  $n=6$ , LCP\_permafrost:  $n=6$ , FCP\_permafrost:  $n=7$ , HCP\_permafrost:  $n=6$ ). Effects of polygon type, soil layer category, and their interaction were tested either using LME (ANOVA type III) or Kruskal Wallis test, followed by pairwise comparisons (Tukey-adjusted emmeans pairwise tests and Bonferroni-adjusted pairwise Wilcoxon tests). For space saving reasons, the presented statistics refer to the observations discussed in the main text. If phylum abundances were too imbalanced for statistical testing, other relevant abundance information is stated instead.*



**Supplementary Table 9.:** Abundances (ddPCR-corrected reads  $g^{-1}$  DW soil) of fungal phyla in examined soil layers per polygon type.

|                   | Soil layer   | LCP                                     | FCP                                     | HCP                                     | Polygon effect                                                                                                       | Soil layer effect                                                                                                            | Interactive effect                                                       |
|-------------------|--------------|-----------------------------------------|-----------------------------------------|-----------------------------------------|----------------------------------------------------------------------------------------------------------------------|------------------------------------------------------------------------------------------------------------------------------|--------------------------------------------------------------------------|
| Ascomycota        | organic      | $1.04 \text{ e}^7 \pm 3.18 \text{ e}^6$ | $6.61 \text{ e}^7 \pm 2.18 \text{ e}^7$ | $8.70 \text{ e}^7 \pm 2.44 \text{ e}^7$ | Kruskal Wallis:<br>$p=0.361$                                                                                         | Kruskal Wallis:<br>$p=9.3 \text{ e}^{-9}$<br>The organic layer harbored 96.7 % of ddPCR-corr. reads assigned to this phylum. | LCP organic harbored 6.4 % of ddPCR-corr. reads assigned to this phylum. |
|                   | mineral      | $3.45 \text{ e}^5 \pm 3.11 \text{ e}^5$ | $7.37 \text{ e}^5 \pm 4.23 \text{ e}^5$ | $1.63 \text{ e}^6 \pm 1.08 \text{ e}^6$ |                                                                                                                      |                                                                                                                              |                                                                          |
|                   | cryoturbated | -                                       | $7.81 \text{ e}^5 \pm 3.61 \text{ e}^5$ | $2.56 \text{ e}^6 \pm 5.03 \text{ e}^5$ |                                                                                                                      |                                                                                                                              |                                                                          |
|                   | permafrost   | $6.18 \text{ e}^5 \pm 3.10 \text{ e}^5$ | $4.07 \text{ e}^6 \pm 2.03 \text{ e}^6$ | $3.34 \text{ e}^5 \pm 2.16 \text{ e}^5$ |                                                                                                                      |                                                                                                                              |                                                                          |
| Basidiomycota     | organic      | $3.32 \text{ e}^5 \pm 2.77 \text{ e}^5$ | $2.00 \text{ e}^7 \pm 6.36 \text{ e}^6$ | $3.16 \text{ e}^7 \pm 1.46 \text{ e}^7$ | Kruskal Wallis:<br>$p=0.023$<br><br>Pairwise Wilcox:<br>LCP-FCP: $p=0.049$<br>LCP-HCP: $p=0.055$<br>FCP-HCP: $p=1.0$ | Kruskal Wallis:<br>$p=3.6 \text{ e}^{-6}$<br>The organic layer harbored 99 % of ddPCR-corr. reads assigned to this phylum.   | LCP organic harbored < 1% of ddPCR-corr. reads assigned to this phylum.  |
|                   | mineral      | $1.02 \text{ e}^3 \pm 1.02 \text{ e}^3$ | $8.50 \text{ e}^4 \pm 5.86 \text{ e}^4$ | $2.54 \text{ e}^5 \pm 2.39 \text{ e}^5$ |                                                                                                                      |                                                                                                                              |                                                                          |
|                   | cryoturbated | -                                       | $3.68 \text{ e}^4 \pm 2.64 \text{ e}^4$ | $4.78 \text{ e}^5 \pm 4.60 \text{ e}^5$ |                                                                                                                      |                                                                                                                              |                                                                          |
|                   | permafrost   | $5.86 \text{ e}^3 \pm 4.65 \text{ e}^3$ | $2.23 \text{ e}^4 \pm 1.02 \text{ e}^4$ | $1.33 \text{ e}^4 \pm 1.21 \text{ e}^4$ |                                                                                                                      |                                                                                                                              |                                                                          |
| Chytridiomycota   | organic      | $3.97 \text{ e}^3 \pm 3.33 \text{ e}^3$ | $1.35 \text{ e}^6 \pm 7.79 \text{ e}^5$ | $5.27 \text{ e}^6 \pm 3.16 \text{ e}^6$ | Kruskal Wallis:<br>$p=0.047$<br><br>Pairwise Wilcox:<br>LCP-FCP: $p=0.047$<br>LCP-HCP: $p=0.087$<br>FCP-HCP: $p=1.0$ | Kruskal Wallis:<br>$p=2.9 \text{ e}^{-4}$<br>The organic layer harbored > 99 % of ddPCR-corr. reads assigned to this phylum. | LCP organic harbored < 1% of ddPCR-corr. reads assigned to this phylum.  |
|                   | mineral      | $0.00 \pm 0.00$                         | $7.18 \text{ e}^2 \pm 4.80 \text{ e}^2$ | $8.11 \text{ e}^2 \pm 7.07 \text{ e}^2$ |                                                                                                                      |                                                                                                                              |                                                                          |
|                   | cryoturbated | -                                       | $2.18 \text{ e}^3 \pm 1.68 \text{ e}^3$ | $2.16 \text{ e}^4 \pm 2.16 \text{ e}^4$ |                                                                                                                      |                                                                                                                              |                                                                          |
|                   | permafrost   | $0.00 \pm 0.00$                         | $0.00 \pm 0.00$                         | $0.00 \pm 0.00$                         |                                                                                                                      |                                                                                                                              |                                                                          |
| Kickxellomycota   | organic      | $1.15 \text{ e}^4 \pm 1.10 \text{ e}^4$ | $3.06 \text{ e}^5 \pm 2.53 \text{ e}^5$ | $7.06 \text{ e}^3 \pm 7.06 \text{ e}^3$ | Kruskal Wallis:<br>$p=0.898$                                                                                         | The organic layer harbored 94 % of ddPCR-corr. reads assigned to this phylum.                                                | LCP organic harbored < 5% of ddPCR-corr. reads assigned to this phylum.  |
|                   | mineral      | $0.00 \pm 0.00$                         | $0.00 \pm 0.00$                         | $0.00 \pm 0.00$                         |                                                                                                                      |                                                                                                                              |                                                                          |
|                   | cryoturbated | -                                       | $6.77 \text{ e}^3 \pm 6.77 \text{ e}^3$ | $3.37 \text{ e}^3 \pm 3.37 \text{ e}^3$ |                                                                                                                      |                                                                                                                              |                                                                          |
|                   | permafrost   | $0.00 \pm 0.00$                         | $0.00 \pm 0.00$                         | $2.51 \text{ e}^3 \pm 2.51 \text{ e}^3$ |                                                                                                                      |                                                                                                                              |                                                                          |
| Mortierellomycota | organic      | $0.00 \pm 0.00$                         | $4.25 \text{ e}^4 \pm 4.25 \text{ e}^4$ | $9.03 \text{ e}^4 \pm 5.51 \text{ e}^4$ | Phylum is absent from LCP soils                                                                                      | The organic layer harbored 82 % of ddPCR-corr. reads                                                                         |                                                                          |
|                   | mineral      | $0.00 \pm 0.00$                         | $2.73 \text{ e}^3 \pm 2.73 \text{ e}^3$ | $3.67 \text{ e}^2 \pm 2.40 \text{ e}^2$ |                                                                                                                      |                                                                                                                              |                                                                          |
|                   | cryoturbated | -                                       | $3.14 \text{ e}^3 \pm 2.18 \text{ e}^3$ | $4.14 \text{ e}^4 \pm 4.14 \text{ e}^4$ |                                                                                                                      |                                                                                                                              |                                                                          |

|                              |              |                                           |                                           |                                           |                                          |                                                                                                              |                                                                         |
|------------------------------|--------------|-------------------------------------------|-------------------------------------------|-------------------------------------------|------------------------------------------|--------------------------------------------------------------------------------------------------------------|-------------------------------------------------------------------------|
|                              | permafrost   | 0.00 ± 0.00                               | 4.58 e <sup>3</sup> ± 2.09 e <sup>3</sup> | 2.13 e <sup>3</sup> ± 2.13 e <sup>3</sup> |                                          | assigned to this phylum.                                                                                     |                                                                         |
| Rozellomycota                | organic      | 0.00 ± 0.00                               | 1.48 e <sup>5</sup> ± 1.03 e <sup>5</sup> | 2.30 e <sup>3</sup> ± 2.12 e <sup>6</sup> | Phylum is absent from LCP soils.         | The organic layer harbored 82 % of ddPCR-corr. reads assigned to this phylum.                                | LCP organic harbored >1 % of ddPCR-corr. reads assigned to this phylum. |
|                              | mineral      | 0.00 ± 0.00                               | 0.00 ± 0.00                               | 0.00 ± 0.00                               |                                          |                                                                                                              |                                                                         |
|                              | cryoturbated | -                                         | 2.01 e <sup>2</sup> ± 2.01 e <sup>2</sup> | 0.00 ± 0.00                               |                                          |                                                                                                              |                                                                         |
|                              | permafrost   | 0.00 ± 0.00                               | 0.00 ± 0.00                               | 0.00 ± 0.00                               |                                          |                                                                                                              |                                                                         |
| Unknown Taxa on phylum level | organic      | 6.11 e <sup>6</sup> ± 3.39 e <sup>6</sup> | 9.61 e <sup>7</sup> ± 4.33 e <sup>7</sup> | 4.62 e <sup>7</sup> ± 1.39 e <sup>7</sup> | Kruskal-Wallis: p=0.083                  | Kruskal Wallis: p=0.025<br>The organic layer harbored > 92 % of ddPCR-corr. reads unassigned at phylum level |                                                                         |
|                              | mineral      | 3.75 e <sup>4</sup> ± 4.58 e <sup>3</sup> | 1.31 e <sup>6</sup> ± 6.52 e <sup>5</sup> | 1.34 e <sup>6</sup> ± 6.85 e <sup>5</sup> |                                          |                                                                                                              |                                                                         |
|                              | cryoturbated | -                                         | 6.52 e <sup>6</sup> ± 4.24 e <sup>6</sup> | 1.23 e <sup>7</sup> ± 7.57 e <sup>6</sup> |                                          |                                                                                                              |                                                                         |
|                              | permafrost   | 5.49 e <sup>5</sup> ± 5.25 e <sup>5</sup> | 2.12 e <sup>6</sup> ± 1.08 e <sup>6</sup> | 2.30 e <sup>5</sup> ± 1.13 e <sup>5</sup> |                                          |                                                                                                              |                                                                         |
| Zoopagomycota                | organic      | 0.00 ± 0.00                               | 0.00 ± 0.00                               | 5.66 e <sup>4</sup> ± 5.66 e <sup>4</sup> | Phylum is solely present in HCP organic. | Phylum is solely present in HCP organic.                                                                     | HCP organic harbored 100% of ddPCR-corr. reads assigned to this phylum. |
|                              | mineral      | 0.00 ± 0.00                               | 0.00 ± 0.00                               | 0.00 ± 0.00                               |                                          |                                                                                                              |                                                                         |
|                              | cryoturbated | -                                         | 0.00 ± 0.00                               | 0.00 ± 0.00                               |                                          |                                                                                                              |                                                                         |
|                              | permafrost   | 0.00 ± 0.00                               | 0.00 ± 0.00                               | 0.00 ± 0.00                               |                                          |                                                                                                              |                                                                         |

*Presented are means ± standard error (LCP\_organic: n=12, FCP\_organic: n=12, HCP\_organic: n=11, LCP\_mineral: n=2, FCP\_mineral: n=6, HCP\_mineral: n=6, FCP\_cryoturbated: n=6, HCP<sub>cryoturbated</sub>: n=6, LCP\_permafrost: n=5, FCP\_permafrost: n=6, HCP\_permafrost: n=6, except for Basidiomycota: HCP\_organic: n=10). Effects of polygon type, soil layer category, and their interaction were tested either using LME (ANOVA type III) or Kruskal Wallis test, followed by pairwise comparisons (Tukey-adjusted emmeans pairwise tests and Bonferroni-adjusted pairwise Wilcoxon tests). For space saving reasons, the presented statistics refer to the observations discussed in the main text. If phylum abundances were too imbalanced for statistical testing, other relevant abundance information is stated instead.*

(a)

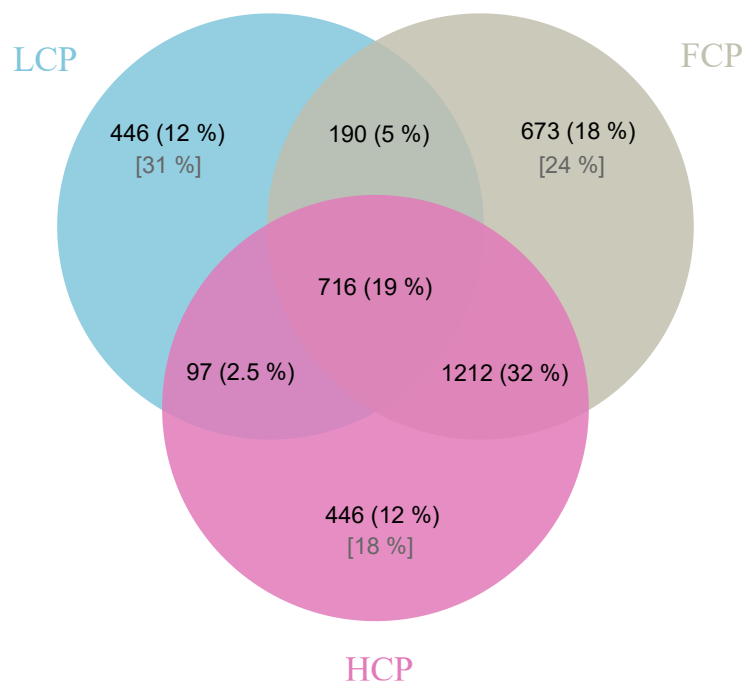

(b)

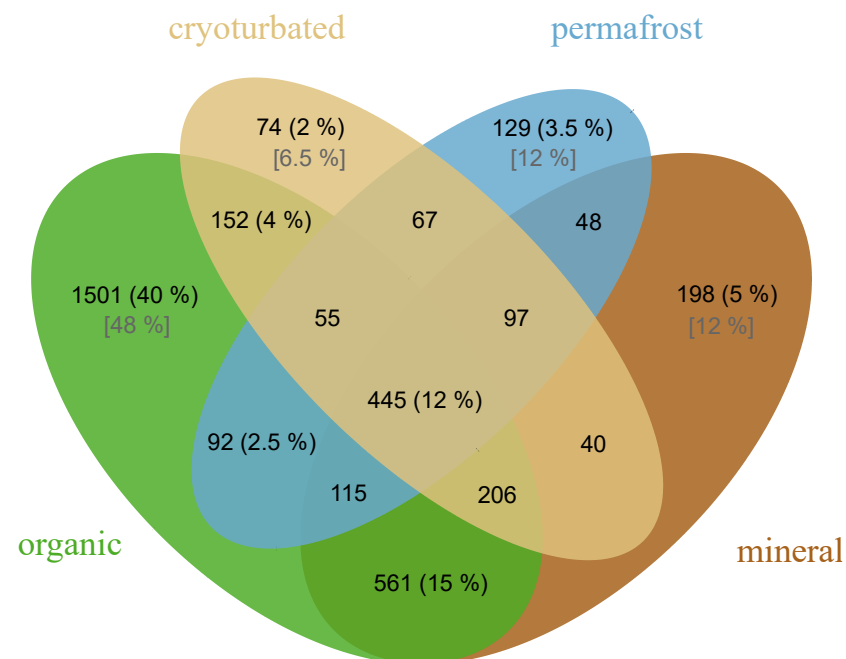

**Supplementary Figure 5.:** Venn Diagram depicting the number of shared and unique bacterial and archaeal ASVs among investigated (a) ice-wedge polygon types ( $n_{LCP}=19$ ,  $n_{FPT}=30$ ,  $n_{HCP}=29$ ) and (b) soil layer categories ( $n_{organic}=35$ ,  $n_{mineral}=14$ ,  $n_{cryoturbated}=11$ ,  $n_{permafrost}=19$ ). Fractions of the shared and unique taxa from the total number of substances ( $n=3780$ ) are given in (%). Relative proportion of polygon-specific/ soil layer-specific ASVs relative to total ASVs per polygon type/soil layer (grey) are given in [%].

(a)

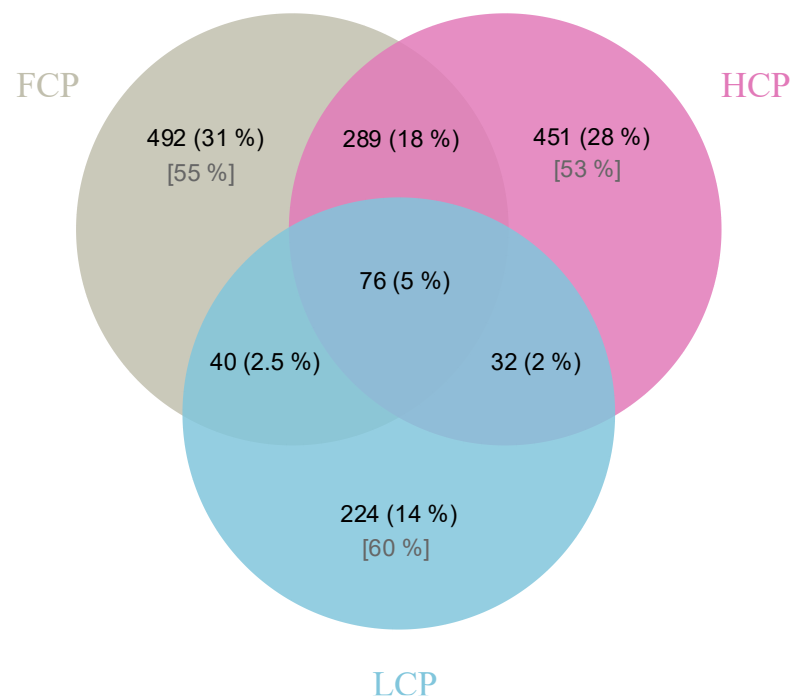

(b)

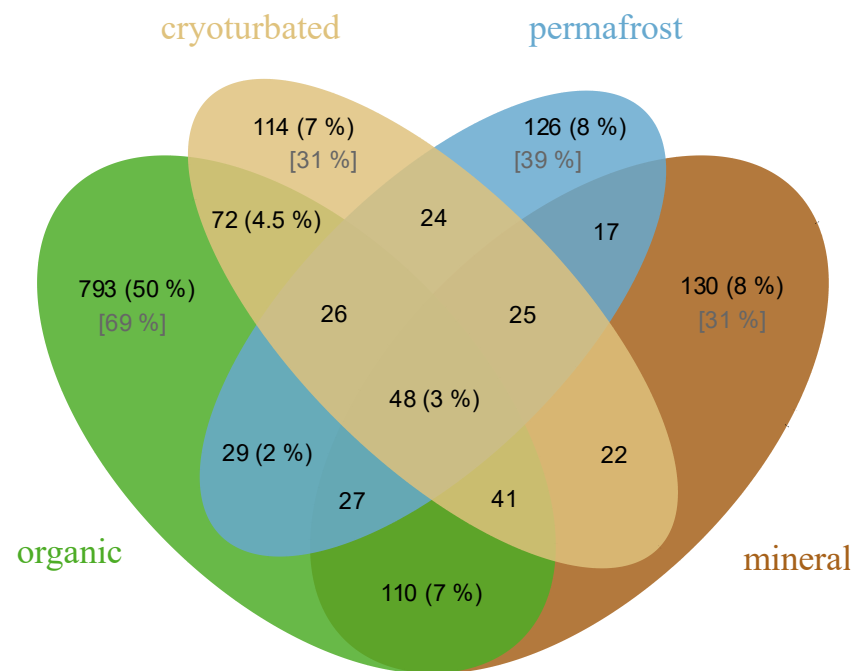

**Supplementary Figure 6.:** Venn Diagram depicting the number of shared and unique fungal ASVs among investigated (a) ice-wedge polygon types ( $n_{LCP}=19$ ,  $n_{FPT}=30$ ,  $n_{HCP}=29$ ) and (b) soil layer categories ( $n_{organic}=35$ ,  $n_{mineral}=14$ ,  $n_{cryoturbated}=12$ ,  $n_{permafrost}=17$ ). Fractions of the shared and unique taxa from the total number of substances ( $n=1604$ ) are given in (%). Relative proportion of polygon-specific/ soil layer-specific ASVs relative to total ASVs per polygon type/soil layer (grey) are given in [%].

## Section 5: Extracellular enzymatic activity potential

We measured the potential activities of the six hydrolytic extracellular enzymes:  $\beta$ -D-1,4-cellobiosidase (exoglucanase),  $\beta$ -D-1,4-glucosidase,  $\beta$ -1,4-N-acetyl- glucosaminidase (exochitinase), leucine-aminopeptidase (protease), acid phosphatase, and sulfatase (Aryl-sulfate sulfohydrolase), using microplate fluorometric assays as described in Canarini et al., 2021. Per sample, one gram of soil was suspended in 100 ml sodium acetate buffer (100 mM, pH 5.5) and subsequently sonicated to an energy absorption of 350 J. 200  $\mu$ l of the soil suspension and 50  $\mu$ l of substrate were pipetted into black microtiter plates in five technical replicates. The used substrates were: 4-MUF- $\beta$ -D-cellobioside, 4-MUF- $\beta$ -D-glucoside, 4-MUF-N-acetyl- $\beta$ -D-glucosaminide, L-Leucine-7-amino-4-methylcoumarin, 4-MUF-phosphate, 4-MUF-sulfate. 4-Methylumbelliferone (MUF) was used as standard for cellobiosidase,  $\beta$ -glucosidase, exochitinase, phosphatase and sulfatase, whereas 7-Amino-4-methylcoumarine (AMC) was used to calibrate protease activity. All plates were incubated at 20 °C for 15 minutes in the dark and fluorescence was measured at 365 nm excitation and 450 nm emission (Tecan Infinite M200fluorimeter, Werfen, Austria) every 30 minutes for 3 hours. Potential extracellular enzymatic activities were calculated considering the increase in fluorescence between measurement time points.

**Supplementary Table 10.:** Correlation between enzyme activities ( $\text{nmol g}^{-1} \text{DW h}^{-1}$ ) and Soil C, N, P contents ( $\text{mg g}^{-1} \text{DW}$ ).

|                        | Soil C                                          | Soil N                                          | Soil P                                          |
|------------------------|-------------------------------------------------|-------------------------------------------------|-------------------------------------------------|
| Betaglucosidase        | $\rho(79) = 0.743$<br>$p < 2.2 \text{ e}^{-16}$ |                                                 |                                                 |
| Exoglucanase           | $\rho(77) = 0.646$<br>$p < 2.2 \text{ e}^{-16}$ |                                                 |                                                 |
| Exochitinase           | $\rho(78) = 0.471$<br>$p = 1.30 \text{ e}^{-5}$ | $\rho(78) = 0.471$<br>$p = 1.32 \text{ e}^{-5}$ |                                                 |
| Leucine-Aminopeptidase | $\rho(79) = 0.663$<br>$p < 2.2 \text{ e}^{-16}$ | $\rho(79) = 0.660$<br>$p < 2.2 \text{ e}^{-16}$ |                                                 |
| Acid Phosphatase       | $\rho(79) = 0.810$<br>$p < 2.2 \text{ e}^{-16}$ |                                                 | $\rho(78) = 0.594$<br>$p = 1.18 \text{ e}^{-8}$ |
| Sulfatase              | $\rho(75) = 0.680$<br>$p < 2.2 \text{ e}^{-16}$ |                                                 |                                                 |

Presented are Spearman's Rank Order correlation coefficient  $\rho(df)$  and respective  $p$ -values (two-sided test)..

**Supplementary Table 11:** Interactive effects of polygon type and soil layer category on extracellular enzymatic activity potentials (nmol substrate g<sup>-1</sup> soil C h<sup>-1</sup>; corresponding to Fig. 5. in main text).

| Soil Layer   | Polygon     | Betaglucosidase<br>(emmeans) | Exoglucanase<br>(pairwise Wilcox) | Exochitinase<br>(emmeans) | Leucine Aminopeptidase<br>(pairwise Wilcox) | Acid Phosphatase<br>(pairwise Wilcox) |
|--------------|-------------|------------------------------|-----------------------------------|---------------------------|---------------------------------------------|---------------------------------------|
| organic      | LCP vs. FCP | p<0.0001                     | p=0.003                           | p=0.010                   | p=0.070                                     | p=0.0007                              |
|              | LCP vs. HCP | p=0.001                      | p=0.002                           |                           | p=0.063                                     |                                       |
|              | FCP vs. HCP | p=0.035                      |                                   | p=0.034                   |                                             |                                       |
| mineral      | LCP vs. FCP |                              |                                   |                           |                                             |                                       |
|              | LCP vs. HCP |                              |                                   |                           |                                             |                                       |
|              | FCP vs. HCP |                              |                                   |                           |                                             |                                       |
| cryoturbated | FCP vs. HCP |                              |                                   |                           |                                             |                                       |
| permafrost   | LCP vs. FCP |                              | p=0.010                           | p=0.026                   |                                             |                                       |
|              | LCP vs. HCP |                              |                                   | p=0.006                   |                                             |                                       |
|              | FCP vs. HCP |                              | p=0.025                           |                           |                                             |                                       |

| Polygon | Soil Layer                                                                                                                                                     | Betaglucosidase<br>(emmeans)                   | Exoglucanase<br>(pairwise Wilcox) | Exochitinase<br>(emmeans)                 | Leucine Aminopeptidase<br>(pairwise Wilcox) | Acid Phosphatase<br>(pairwise Wilcox) |
|---------|----------------------------------------------------------------------------------------------------------------------------------------------------------------|------------------------------------------------|-----------------------------------|-------------------------------------------|---------------------------------------------|---------------------------------------|
| LCP     | organic vs. mineral<br>organic vs. permafrost<br>mineral vs. permafrost                                                                                        |                                                |                                   |                                           |                                             |                                       |
| FCP     | organic vs. mineral<br>organic vs. cryoturbated<br>organic vs. permafrost<br>mineral vs. cryoturbated<br>mineral vs. permafrost<br>cryoturbated vs. permafrost | p<0.0001<br>p<0.0001<br>p=0.006<br><br>p=0.012 | p=0.043                           |                                           | p=0.036                                     | p=0.010<br>p=0.028<br>p=0.003         |
| HCP     | organic vs. mineral<br>organic vs. cryoturbated<br>organic vs. permafrost<br>mineral vs. cryoturbated<br>mineral vs. permafrost<br>cryoturbated vs. permafrost | p<0.0001<br>p=0.020<br>p=0.006                 | p=0.076<br>p=0.062<br>p=0.034     | p=0.0001<br>p=0.003<br>p=0.002<br>p=0.030 | p=0.013                                     |                                       |

*Only relevant results (significant or almost significant) for pairwise comparisons (Tukey-adjusted emmeans tests following LME, or Bonferroni-adjusted pairwise Wilcox test following Kruskal Wallis test) are shown. Note that no interaction occurred for sulfatase activity.*

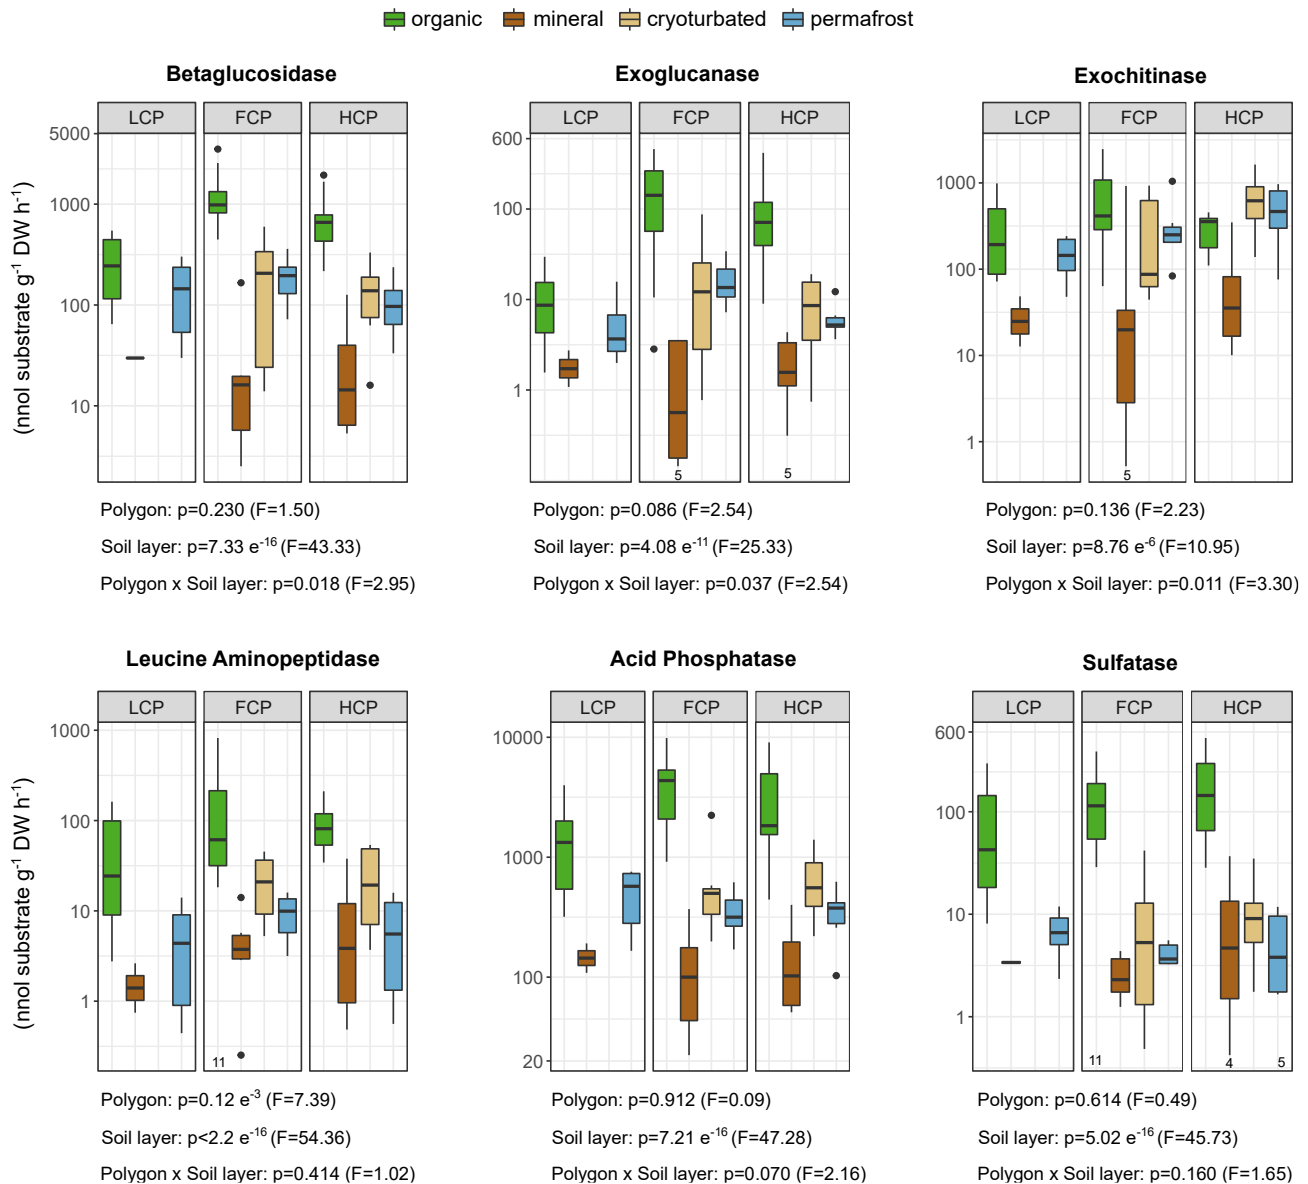

**Supplementary Figure 7.:** Extracellular enzymatic activity potential in investigated soil layer categories and ice-wedge polygon types. Rates ( $\text{nmol substrate g}^{-1} \text{DW h}^{-1}$ ) are depicted on a log-scale for improved readability (LCP\_organic:  $n=12$ , FCP\_organic:  $n=12$ , HCP\_organic:  $n=11$ , LCP\_mineral:  $n=2$ , FCP\_mineral:  $n=6$ , HCP\_mineral:  $n=6$ , FCP\_cryoturbated:  $n=7$ , HCP\_cryoturbated:  $n=6$ , LCP\_permafrost:  $n=6$ , FCP\_permafrost:  $n=7$ , HCP\_permafrost:  $n=6$ ; with deviations stated below respective boxplots). Effects of polygon type and soil layer category are stated under respective panels (LME ANOVA type III test results). Please note that N-, P- and S-depolymerizing enzymes are inherently related to the C-cycle, which hinders the clear differentiation between microbial nutrient- versus C acquisition.

#### Interactive effects:

**Organic:** The organic layer of LCPs had lower betaglucosidase- (emmeans LCP vs. FCP:  $p<0.0001$ ,  $t=-5.1$ , LCP vs. HCP:  $p=0.007$ ,  $t=-3.2$ ), exoglucanase- (emmeans: LCP vs. FCP:  $p<0.0001$ ,  $t=-5.1$ , LCP vs. HCP:  $p=0.0004$ ,  $t=-4.2$ ), and acid phosphatase- (emmeans: LCP vs. FCP:  $p=0.002$ ,  $t=-3.6$ , LCP vs. HCP:  $p=0.065$ ,  $t=-2.3$ ) -rates than the organic layers of FCPs and HCPs.



**Permafrost:** *The permafrost layer of LCPs had lower exochitinase rates than the permafrost samples of HCPs (emmeans: LCP vs. HCP:  $p=0.055$ ,  $t=-2.4$ ).*

## Section 6: Statistics

We employed linear-mixed-effects models (lmes) to test all univariate variables for the fixed effects of 'ice-wedge polygon type' and 'soil layer category' plus their interaction. Therefore, we used the packages lme4 (Bates et al., 2015), lmerTest (Kuznetsova et al., 2017), emmeans, (Lenth et al., 2022) and car (Fox and Weisberg, 2019). While we acknowledge the difference in glaciation history between the examined sites, we anticipated only negligible historical influences on the characteristics of the recent SOM pool and microbial communities. Due to the sites' very similar landscape, climate, soils, and vegetation, we determined the random effect in the lme model as specific soil pit ID blocked within the sampling site (model<-lmer(variable~polygon.type\*soil.layer.category + (1|site/soil pit)). Model results were inspected using the anova() function with the default being a type III analysis of variance (ANOVA). In the case of no interactive effect being observed we used type II ANOVA to account for potential effects of different treatment replicates (Langsrud, 2003) . We used the Estimated Marginal Means post hoc test to perform multiple comparisons on the fixed effects of polygon type and soil layer category (emmeans(model,pairwise~Polygon.type,adjust='tukey'), emmeans(model,pairwise~Soil.layer.category,adjust='tukey'). In the case of an interactive effect being observed by ANOVA result and /or visual investigation of the data, we compared (a) differences between soil layers per type of polygon (emmeans(model,pairwise~Soil.layer.category|Polygon.type, adjust='tukey') and (b) differences between polygon types per soil layer category (emmeans(model,pairwise~Polygon.type |Soil.layer.category, adjust='tukey'). We checked for homogeneity of variances and normality of model residuals by inspecting frequency histograms, boxplots, QQ-plots, and via Shapiro and Levene tests. If model assumptions were not met, a log- or sqrt-transformation was applied. In case of no agreement with model assumptions after transformation, we conducted nonparametric tests. Kruskal Wallis tests were used to test the effects of Polygon.type and Soil.layer.category, followed by pairwise two-sided Wilcoxon tests (function pairwise.wilcox.test(), p.adjust='bonferroni'). We also applied Wilcoxon tests on respectively subsetting parts of the dataset to check for possible interactive effects in a comparable manner as described for the lme models and additionally used faceted boxplots for checking the distribution of the examined parameter among all soil layer categories within each type of polygon.

We employed the phyloseq package (McMurdie and Holmes, 2013) for handling the multivariate datasets on amplicon sequencing and SOM chemical composition. Following Alteio et al., 2021, we applied a centered log-ratio (clr) data normalization (microbiome::

transform(phyloseq.object, "clr") and calculated euclidean distance matrices  
(phyloseq::distance(phyloseq.object, "euclidean"). We performed Principal Component  
Analyses (PCAs) for visualization, employing the function 'phyloseq::ordinate()'. We used  
Permutational Multivariate Analysis of Variance (PERMANOVA) to explore the effects of  
polygon type and soil layer category and their possible interaction (adonis()-function  
implemented in vegan with 999 permutations and p.adjust.m='bonferroni'; vegan version 2.5-  
7, Oksanen et al., 2020). We tested differences between polygon types and/or soil layer  
categories by pairwise multilevel comparisons (pairwise.adonis()-function implemented in  
vegan with 999 permutations and p.adjust.m='bonferroni'). In case of interactive effects, we  
used subsetting datasets for making pairwise tests. Analogously as described for the lme  
model, we tested for (a) differences between soil layers within each polygon type and (b) for  
differences between polygon types for each soil layer. As PERMANOVA test results are  
sensitive to heterogeneous dispersions among the investigated groups, we tested their  
variance of dispersion using Permutation Tests for Multivariate Dispersion Homogeneity  
(PERMDIST), implemented in vegan (vegan::betadisper()-function) using 999 permutations  
and the argument 'bias.adjust=T' for unequal sample numbers (Anderson, 2017). We used  
Venn diagrams (get\_vennlist(phyloseq.object)) for visualizing the fraction of shared versus  
unique pyrolysis products and/or microbial ASVs among polygon types and soil layers  
respectively (MicrobiotaProcess package, Xu et al., 2022)

## Section 7: References:

- Alteio, L. V., Séneca, J., Canarini, A., Angel, R., Jansa, J., Guseva, K., Kaiser, C., Richter, A., Schmidt, H., 2021. A critical perspective on interpreting amplicon sequencing data in soil ecological research. *Soil Biol. Biochem.* 160. <https://doi.org/10.1016/j.soilbio.2021.108357>
- Anderson, M., 2017. Permutational Multivariate Analysis of Variance (PERMANOVA). pp. 1–15. <https://doi.org/10.1002/9781118445112.stat07841>
- Apprill, A., McNally, S., Parsons, R., Weber, L., 2015. Minor revision to V4 region SSU rRNA 806R gene primer greatly increases detection of SAR11 bacterioplankton. *Aquat. Microb. Ecol.* 75, 129–137.
- Bates, D., Mächler, M., Bolker, B., Walker, S., 2015. Fitting Linear Mixed-Effects Models Using lme4. *J. Stat. Softw.* 67, 1–48. <https://doi.org/10.18637/jss.v067.i01>
- Beck, H., Zimmermann, N., McVicar, T., Vergopolan, N., Berg, A., Wood, E., 2018. Present and future Köppen-Geiger climate classification maps at 1-km resolution. *Sci. Data* 5, 180214. <https://doi.org/10.1038/sdata.2018.214>
- Brooks, G.R., Lane, L.S., 2011. A guide to the landscape of the Firth River Valley, Ivvavik National Park [WWW Document]. *Geol. Surv. Canada, Park. Canada, Nat. Resour. Canada*. URL [https://publications.gc.ca/collections/collection\\_2017/pc/R64-404-2011-eng.pdf](https://publications.gc.ca/collections/collection_2017/pc/R64-404-2011-eng.pdf)
- Buurman, P., Van Bergen, P.F., Jongmans, A.G., Meijer, E.L., Duran, B., Van Lagen, B., 2005. Spatial and temporal variation in podzol organic matter studied by pyrolysis-gas chromatography/mass spectrometry and micromorphology. *Eur. J. Soil Sci.* 56, 253–270. <https://doi.org/https://doi.org/10.1111/j.1365-2389.2004.00662.x>
- Canarini, A., Schmidt, H., Fuchslueger, L., Martin, V., Herbold, C.W., Zetzula, D., Gündler, P., Hasibeder, R., Jecmenica, M., Bahn, M., Richter, A., 2021. Ecological memory of recurrent drought modifies soil processes via changes in soil microbial community. *Nat. Commun.* 12, 1–14. <https://doi.org/10.1038/s41467-021-25675-4>
- Couture, N.J., Pollard, W.H., 2017. A Model for Quantifying Ground-Ice Volume, Yukon Coast, Western Arctic Canada. *Permafr. Periglac. Process.* 28, 534–542. <https://doi.org/https://doi.org/10.1002/ppp.1952>
- D’Angelo, E., Crutchfield, J., 2001. Rapid, Sensitive, Microscale Determination of Phosphate in Water and Soil. *J. Environ. Qual.* 30, 2206.
- Dunnington D, 2023. gspatial: Spatial Data Framework for ggplot2.
- Dyke, A., Prest, V., 1987. Late Wisconsinan and Holocene History of the Laurentide Ice Sheet. *Géographie Phys. Quat.* 41, 237–263. <https://doi.org/https://doi.org/10.7202/032681ar>
- Esri, 2024. Esri World Imagery. “World Hillshade” [basemap] [WWW Document].
- Fox, J., Weisberg, S., 2019. An R Companion to Applied Regression. Third Ed. Sage Thousand Oaks, CA, USA.
- Frank-Fahle, B.A., Yergeau, É., Greer, C.W., Lantuit, H., Wagner, D., 2014. Microbial functional potential and community composition in permafrost-affected soils of the NW Canadian Arctic. *PLoS One* 9. <https://doi.org/10.1371/journal.pone.0084761>

292 Fritz, M., Wetterich, S., Schirrmeister, L., Meyer, H., Lantuit, H., Preusser, F., Pollard, W.H.,  
 293 2012. Eastern Beringia and beyond: Late Wisconsinan and Holocene landscape  
 294 dynamics along the Yukon Coastal Plain, Canada. *Palaeogeogr. Palaeoclimatol.*  
 295 *Palaeoecol.* 319–320, 28–45. <https://doi.org/10.1016/j.palaeo.2011.12.015>

296 González-Pérez, M., Buurman, P., Vidal-Torrado, P., Martin-Neto, L., 2012. Pyrolysis-Gas  
 297 Chromatography/Mass Spectrometry Characterization of Humic Acids in Coastal  
 298 Spodosols from Southeastern Brazil. *Soil Sci. Soc. Am. J.* 76, 961–971.  
 299 <https://doi.org/https://doi.org/10.2136/sssaj2011.0178>

300 Government of Canada, 2024. Canadian Climate Normals & Averages [WWW Document].  
 301 URL [http://climate.weather.gc.ca/climate\\_normals/index\\_e.html](http://climate.weather.gc.ca/climate_normals/index_e.html)

302 Hempfling, R., Schulten, H.R., 1990. Chemical characterization of the organic matter in  
 303 forest soils by Curie point pyrolysis-GC/MS and pyrolysis-field ionization mass  
 304 spectrometry. *Org. Geochem.* 15, 131–145. [https://doi.org/10.1016/0146-](https://doi.org/10.1016/0146-6380(90)90078-E)  
 305 [6380\(90\)90078-E](https://doi.org/10.1016/0146-6380(90)90078-E)

306 Irwin, A., 2021. Data Visualization [WWW Document]. Mak. Maps. URL  
 307 <https://andrewirwin.github.io/data-visualization/mapping-1.html#further-reading-21>

308 Kahle, D., Wickham, H., 2013. ggmap: Spatial Visualization with ggplot2. *R J.* 5, 144–161.  
 309 <https://doi.org/10.32614/RJ-2013-014>

310 Kim, S., Chen, J., Cheng, T., Gindulyte, A., He, J., He, S., Li, Q., Shoemaker, B.A.,  
 311 Thiessen, P.A., Yu, B., Zaslavsky, L., Zhang, J., Bolton, E.E., 2023. PubChem 2023  
 312 update. *Nucleic Acids Res.* 51, D1373–D1380. <https://doi.org/10.1093/nar/gkac956>

313 Kuo, S., 1996. Phosphorus. In *Methods of Soil Analysis, Part 3: Chemical Methods*. Soil  
 314 Science Society of America.

315 Kuznetsova, A., Brockhoff, P.B., Christensen, R.H.B., 2017. lmerTest Package: Tests in  
 316 Linear Mixed Effects Models. *J. Stat. Softw.* 82, 1–26.  
 317 <https://doi.org/10.18637/jss.v082.i13>

318 Langsrud, Ø., 2003. ANOVA for unbalanced data: Use Type II instead of Type III sums of  
 319 squares. *Stat. Comput.* 13, 163–167.

320 Lenth, R. V, Buerkner, P., Herve, M., Love, J., Miguez, F., Riebl, H., Singmann, H., 2022.  
 321 Package “Emmeans”(Version R Package 1.7. 2): Estimated Marginal Means, Aka  
 322 Least-Squares Means [Computer Software].

323 Martin, V., Schmidt, H., Canarini, A., Koranda, M., Hausmann, B., Müller, C.W., Richter, A.,  
 324 2024. Soil cover shapes organic matter pools and microbial communities in soils of  
 325 maritime Antarctica. *Geoderma* 446, 116894.  
 326 <https://doi.org/https://doi.org/10.1016/j.geoderma.2024.116894>

327 McMurdie, P.J., Holmes, S., 2013. phyloseq: An R Package for Reproducible Interactive  
 328 Analysis and Graphics of Microbiome Census Data. *PLoS One* 8, 1–11.  
 329 <https://doi.org/10.1371/journal.pone.0061217>

330 Ninnes, S., Tolu, J., Meyer-Jacob, C., Mighall, T.M., Bindler, R., 2017. Investigating  
 331 molecular changes in organic matter composition in two Holocene lake-sediment  
 332 records from central Sweden using pyrolysis-GC/MS. *J. Geophys. Res. Biogeosciences*  
 333 122, 1423–1438. <https://doi.org/10.1002/2016JG003715>

334 Parada, A.E., Needham, D.M., Fuhrman, J.A., 2016. Every base matters: assessing small  
 335 subunit rRNA primers for marine microbiomes with mock communities, time series and

336 global field samples. *Environ. Microbiol.* 18, 1403–1414.  
337 <https://doi.org/https://doi.org/10.1111/1462-2920.13023>

338 Pebesma, E., 2018. Simple Features for R: Standardized Support for Spatial Vector Data. *R*  
339 *J.* 10, 439–446. <https://doi.org/10.32614/RJ-2018-009>

340 Pjevac, P., Hausmann, B., Schwarz, J., Kohl, G., Herbold, C.W., Loy, A., Berry, D., 2021. An  
341 Economical and Flexible Dual Barcoding, Two-Step PCR Approach for Highly  
342 Multiplexed Amplicon Sequencing. *Front. Microbiol.* 12.  
343 <https://doi.org/10.3389/fmicb.2021.669776>

344 Rampton, V.N., 1982. Quaternary Geology Yukon Coastal Plain, Yukon Territory-Northwest  
345 Territory [WWW Document]. <https://doi.org/https://doi.org/10.4095/111348>

346 Said, M., John, G., Mhilu, C., Manyele, S., 2015. The Study of Kinetic Properties and  
347 Analytical Pyrolysis of Coconut Shells. *J. Renew. Energy* 2015, 307329.  
348 <https://doi.org/https://doi.org/10.1155/2015/307329>

349 Saiz-Jimenez, C., De Leeuw, J.W., 1986. Chemical characterization of soil organic matter  
350 fractions by analytical pyrolysis-gas chromatography-mass spectrometry. *J. Anal. Appl.*  
351 *Pyrolysis* 9, 99–119. [https://doi.org/10.1016/0165-2370\(86\)85002-1](https://doi.org/10.1016/0165-2370(86)85002-1)

352 Schulten, H.R., Schnitzer, M., 1997. The chemistry of soil organic nitrogen: A review. *Biol.*  
353 *Fertil. Soils* 26, 1–15. <https://doi.org/10.1007/s003740050335>

354 Shen, Q., Suarez-Abelenda, M., Camps-Arbestain, M., Calvelo Pereira, R., McNally, S.R.,  
355 Kelliher, F., 2018. Data on the organic matter characteristics of New Zealand soils  
356 under different land uses. *Data Br.* 21, 620–638.  
357 <https://doi.org/https://doi.org/10.1016/j.dib.2018.10.016>

358 Smith, D.P., Peay, K.G., 2014. Sequence depth, not PCR replication, improves ecological  
359 inference from next generation DNA sequencing. *PLoS One* 9, e90234.  
360 <https://doi.org/10.1371/journal.pone.0090234>

361 Soil Classification Working Group, 1998. The Canadian System of Soil Classification, 3rd ed.  
362 Ag. ed.

363 Speetjens, N.J., Tanski, G., Martin, V., Wagner, J., Richter, A., Hugelius, G., Boucher, C.,  
364 Lodi, R., Knoblauch, C., Koch, B.P., Wünsch, U., Lantuit, H., Vonk, J.E., 2022.  
365 Dissolved organic matter characterization in soils and streams in a small coastal low-  
366 Arctic catchment. *Biogeosciences* 19, 3073–3097. [https://doi.org/10.5194/bg-19-3073-](https://doi.org/10.5194/bg-19-3073-2022)  
367 [2022](https://doi.org/10.5194/bg-19-3073-2022)

368 Stewart, C.E., 2012. Evaluation of angiosperm and fern contributions to soil organic matter  
369 using two methods of pyrolysis-gas chromatography-mass spectrometry. *Plant Soil*  
370 351, 31–46. <https://doi.org/10.1007/s11104-011-0927-3>

371 Tarnocai, C., 2004. Northern Soil Research in Canada - Cryosols: Permafrost-Affected Soils,  
372 in: Kimble, J.M. (Ed.), . Springer Berlin Heidelberg, Berlin, Heidelberg, pp. 29–43.  
373 [https://doi.org/10.1007/978-3-662-06429-0\\_3](https://doi.org/10.1007/978-3-662-06429-0_3)

374 Tolu, J., Gerber, L., Boily, J.-F., Bindler, R., 2015. High-throughput characterization of  
375 sediment organic matter by pyrolysis–gas chromatography/mass spectrometry and  
376 multivariate curve resolution: A promising analytical tool in (paleo)limnology. *Anal.*  
377 *Chim. Acta* 880, 93–102. <https://doi.org/https://doi.org/10.1016/j.aca.2015.03.043>

378 Vancampenhout, K., Wouters, K., De Vos, B., Buurman, P., Swennen, R., Deckers, J., 2009.  
379 Differences in chemical composition of soil organic matter in natural ecosystems from

380 different climatic regions - A pyrolysis-GC/MS study. *Soil Biol. Biochem.* 41, 568–579.  
381 <https://doi.org/10.1016/j.soilbio.2008.12.023>

382 Wagner, J., Martin, V., Speetjens, N.J., A'Campo, W., Durstewitz, L., Lodi, R., Fritz, M.,  
383 Tanski, G., Vonk, J.E., Richter, A., Bartsch, A., Lantuit, H., Hugelius, G., 2023. High  
384 resolution mapping shows differences in soil carbon and nitrogen stocks in areas of  
385 varying landscape history in Canadian lowland tundra. *Geoderma* 438, 116652.  
386 <https://doi.org/10.1016/j.geoderma.2023.116652>

387 Walker, D.A., Raynolds, M.K., Daniëls, F.J.A., Einarsson, E., Elvebakk, A., Gould, W.A.,  
388 Katenin, A.E., Kholod, S.S., Markon, C.J., Melnikov, E.S., Moskalenko, N.G., Talbot,  
389 S.S., Yurtsev, B.A.(†, Team, T. other members of the C., 2005. The Circumpolar Arctic  
390 vegetation map. *J. Veg. Sci.* 16, 267–282. [https://doi.org/https://doi.org/10.1111/j.1654-](https://doi.org/https://doi.org/10.1111/j.1654-1103.2005.tb02365.x)  
391 [1103.2005.tb02365.x](https://doi.org/https://doi.org/10.1111/j.1654-1103.2005.tb02365.x)

392 Westerveld, L., Kurvits, T., Schoolmeester, T., Eckhoff, T., Overduin, P., Fritz, M., Alfthan,  
393 B., Sinisalo, A., Mulelid, O., 2023. Arctic Permafrost Atlas.  
394 <https://doi.org/10.61523/KPJI4549>

395 White, Bruns, T., Lee, S., Taylor, J., 1990. White, T. J., T. D. Bruns, S. B. Lee, and J. W.  
396 Taylor. Amplification and direct sequencing of fungal ribosomal RNA Genes for  
397 phylogenetics. pp. 315–322.

398 Wickham, H., 2016. *ggplot2: Elegant Graphics for Data Analysis*, Use R! Springer  
399 International Publishing.

400 Xu, S., Li, Z., Tang, W., Dai, Z., Zhou, L., Feng, T., Chen, M., Liu, S., Fu, X., Wu, T., Hu, E.,  
401 Yu, G., 2022. MicrobiotaProcess: A comprehensive R package for managing and  
402 analyzing microbiome and other ecological data within the tidy framework.  
403 <https://doi.org/10.21203/rs.3.rs-1284357/v1>

404
